# Supplementary material for: Synthesis and Evaluation of Some New 4H-Pyran Derivatives as Antioxidant, Antibacterial and Anti-HCT-116 Cells of CRC, with Molecular Docking, Antiproliferative, Apoptotic and ADME Investigations
Source: MDPI journal article supplement (doi:10.3390/ph15070891), 2022-07-19
Supplement: s1 [file s1]

# Synthesis and evaluation of some 4*H*-pyran derivatives as antioxidant, antibacterial and anti-HCT-116 cells of CRC. Molecular docking, quantitative measurement of CDK2 and real time PCR determination of the expression profiles of Caspase-3 and CDK genes

Nahed N. E. El-Sayed, Magdi E. A. Zaki, Sami A. Al-Hussain, Abir Ben Bacha, Malika Berredjem, Vijay H. Masand, Zainab M. Almarhoon, Hanaa S. Omar

## Representative spectra

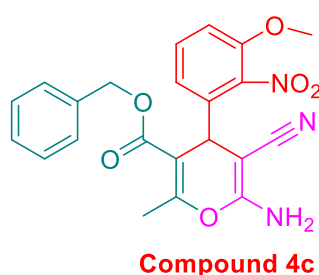

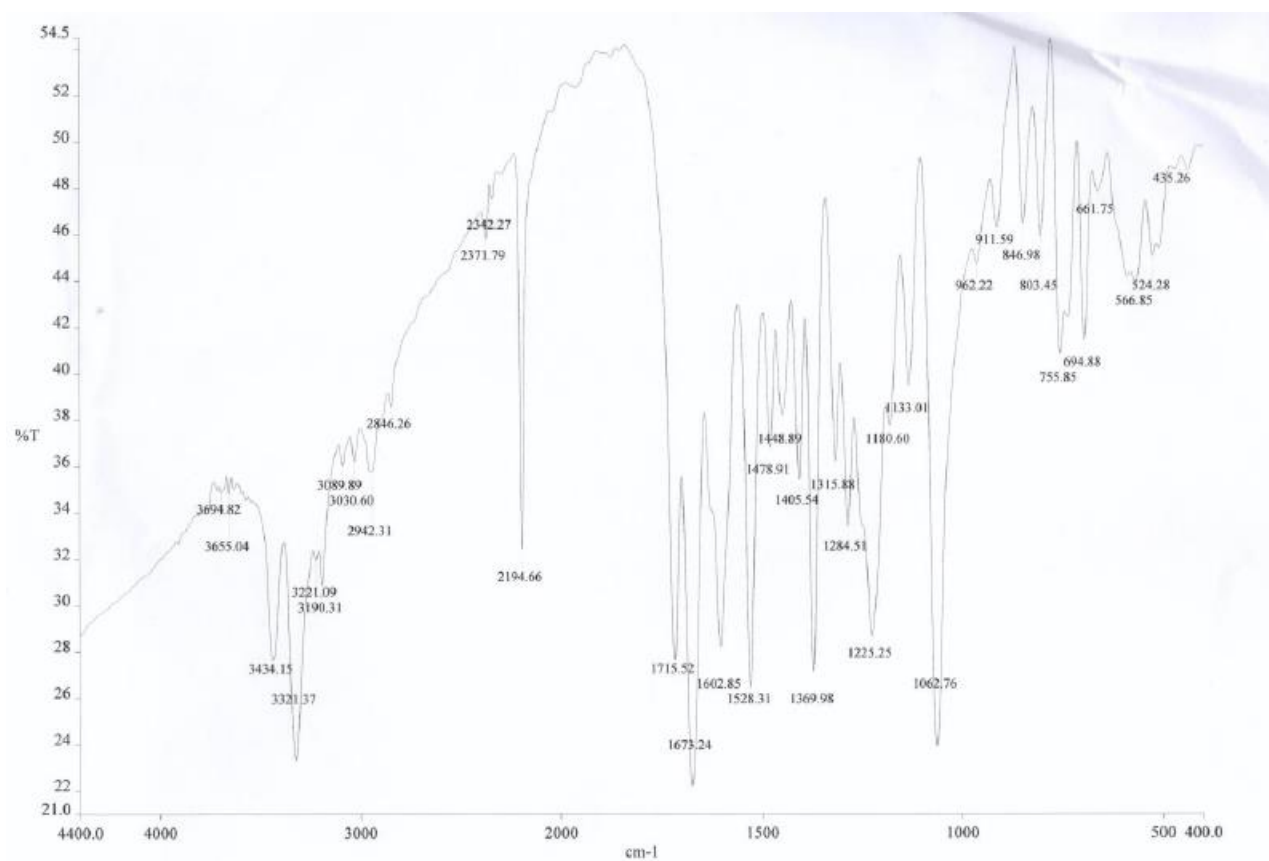

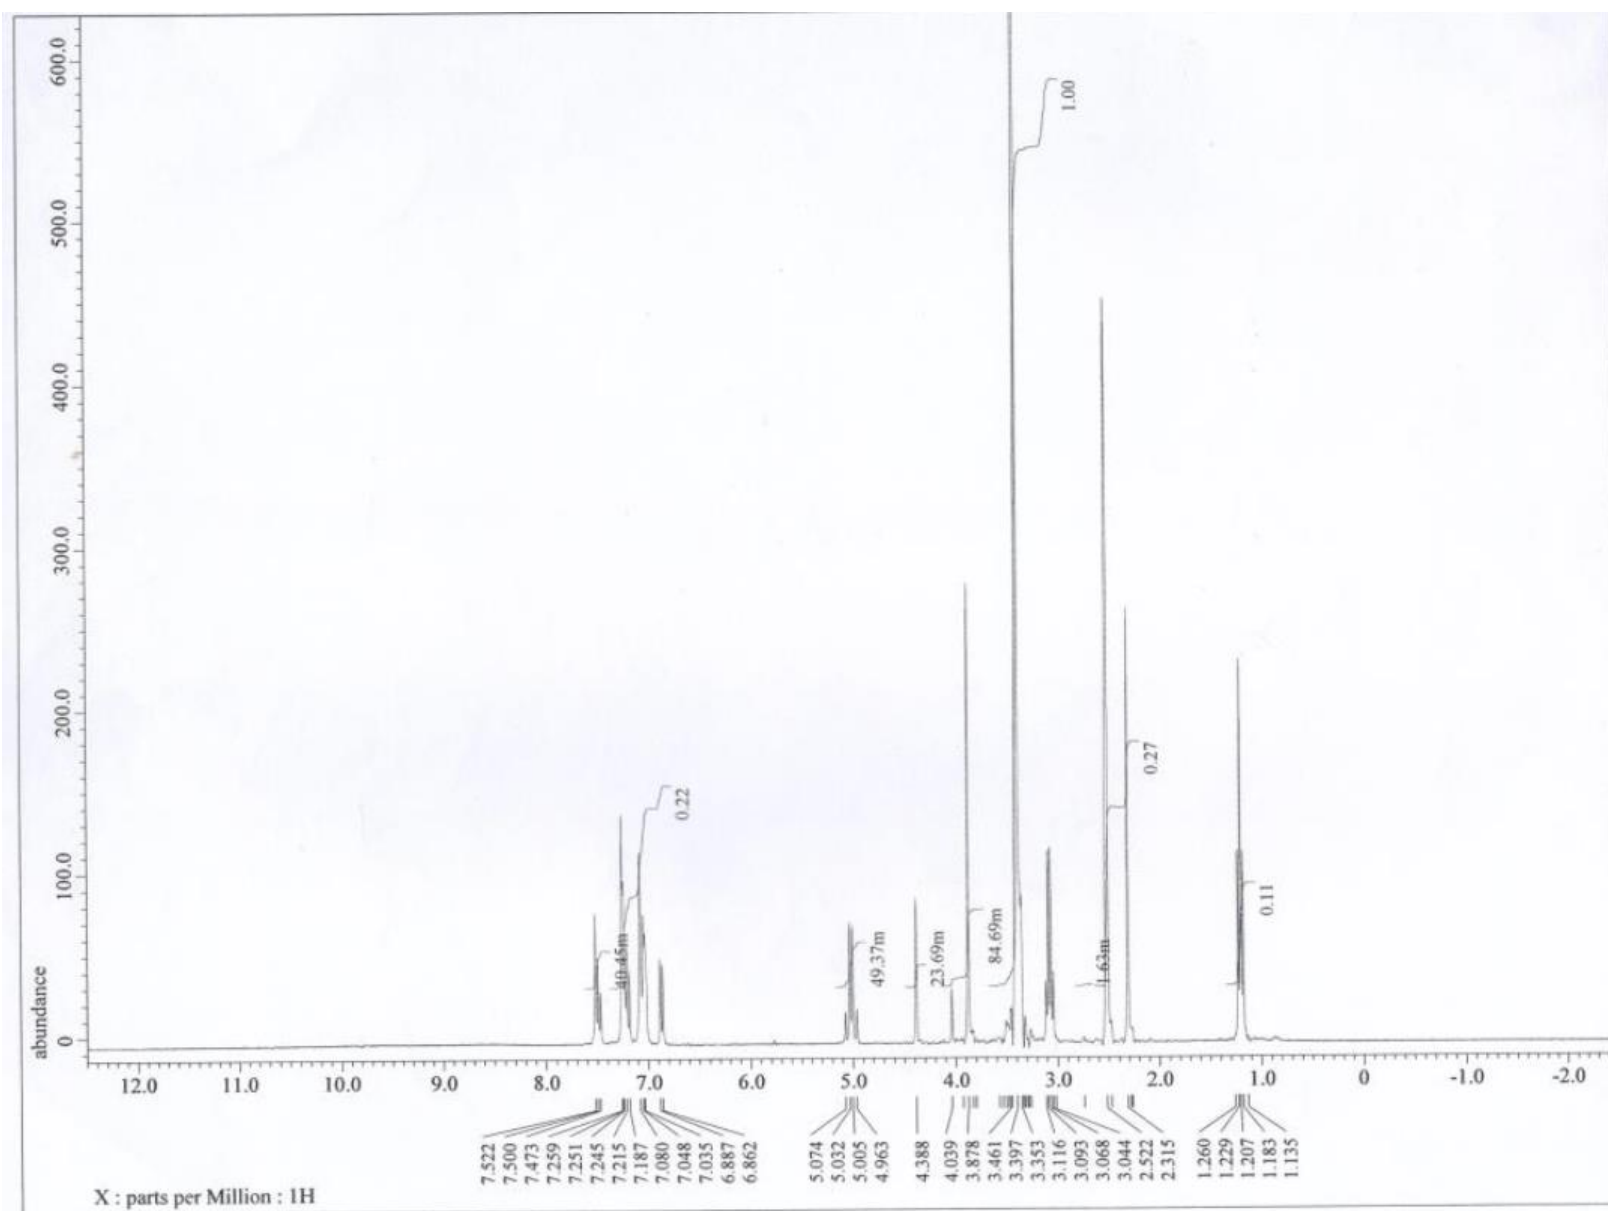

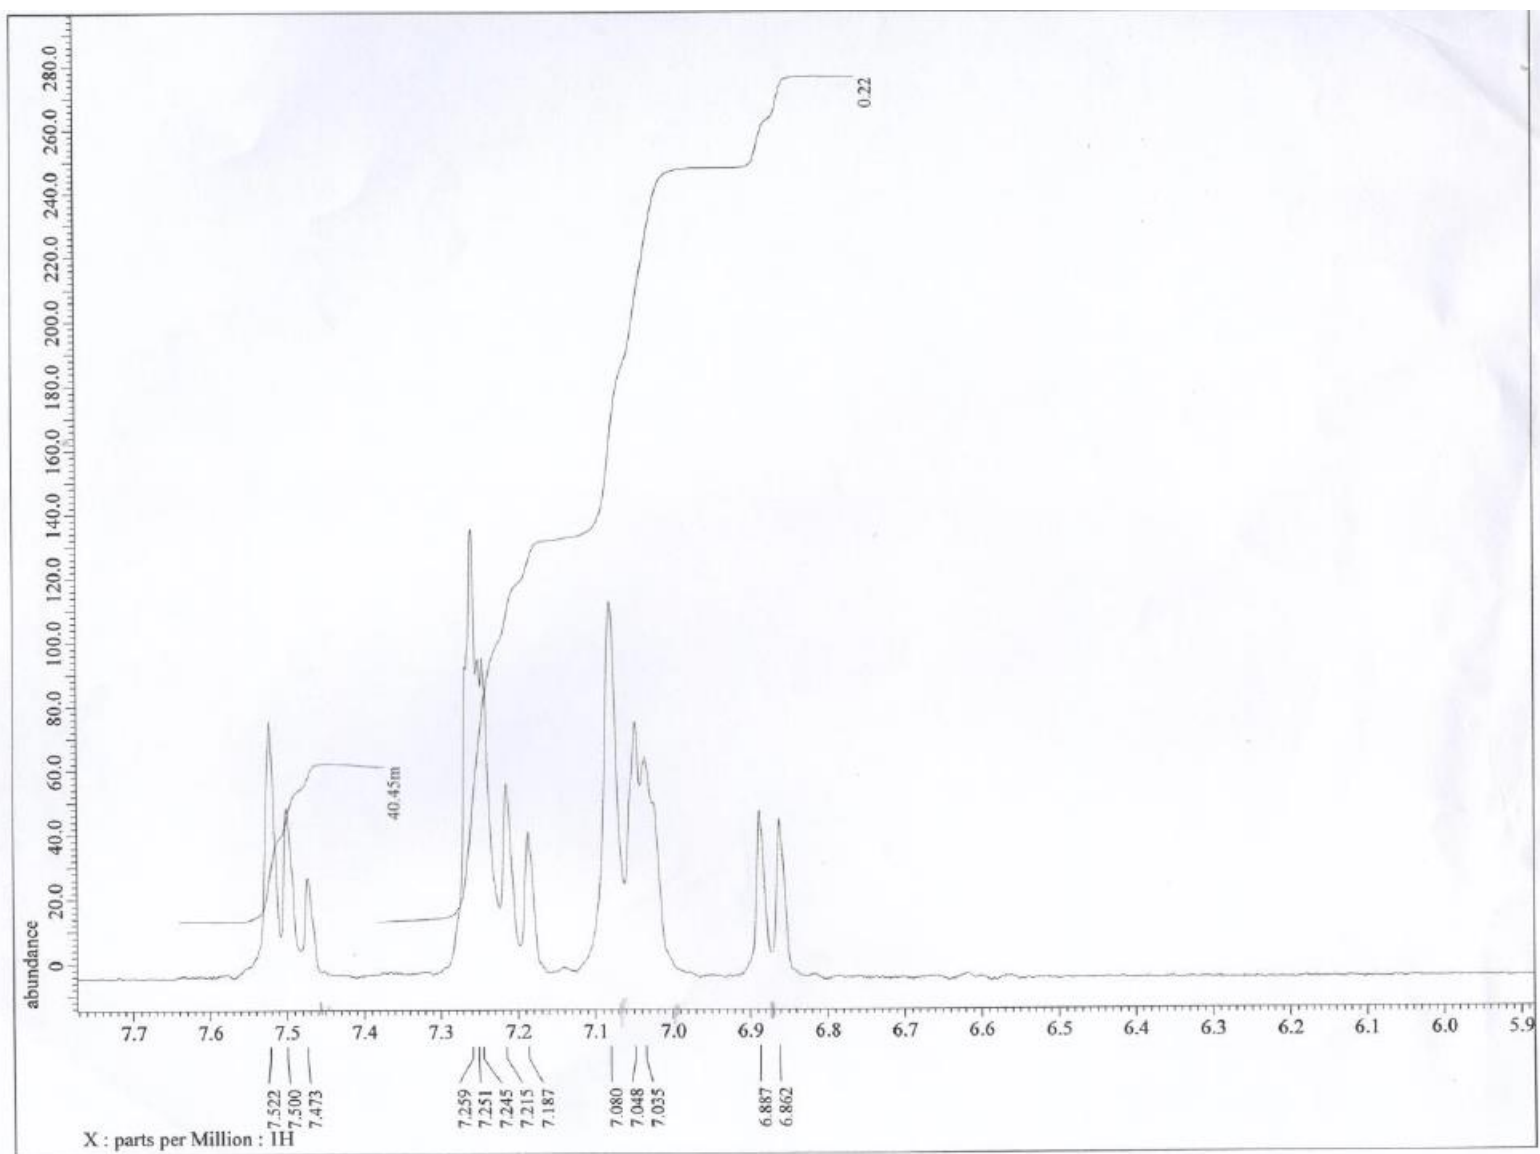

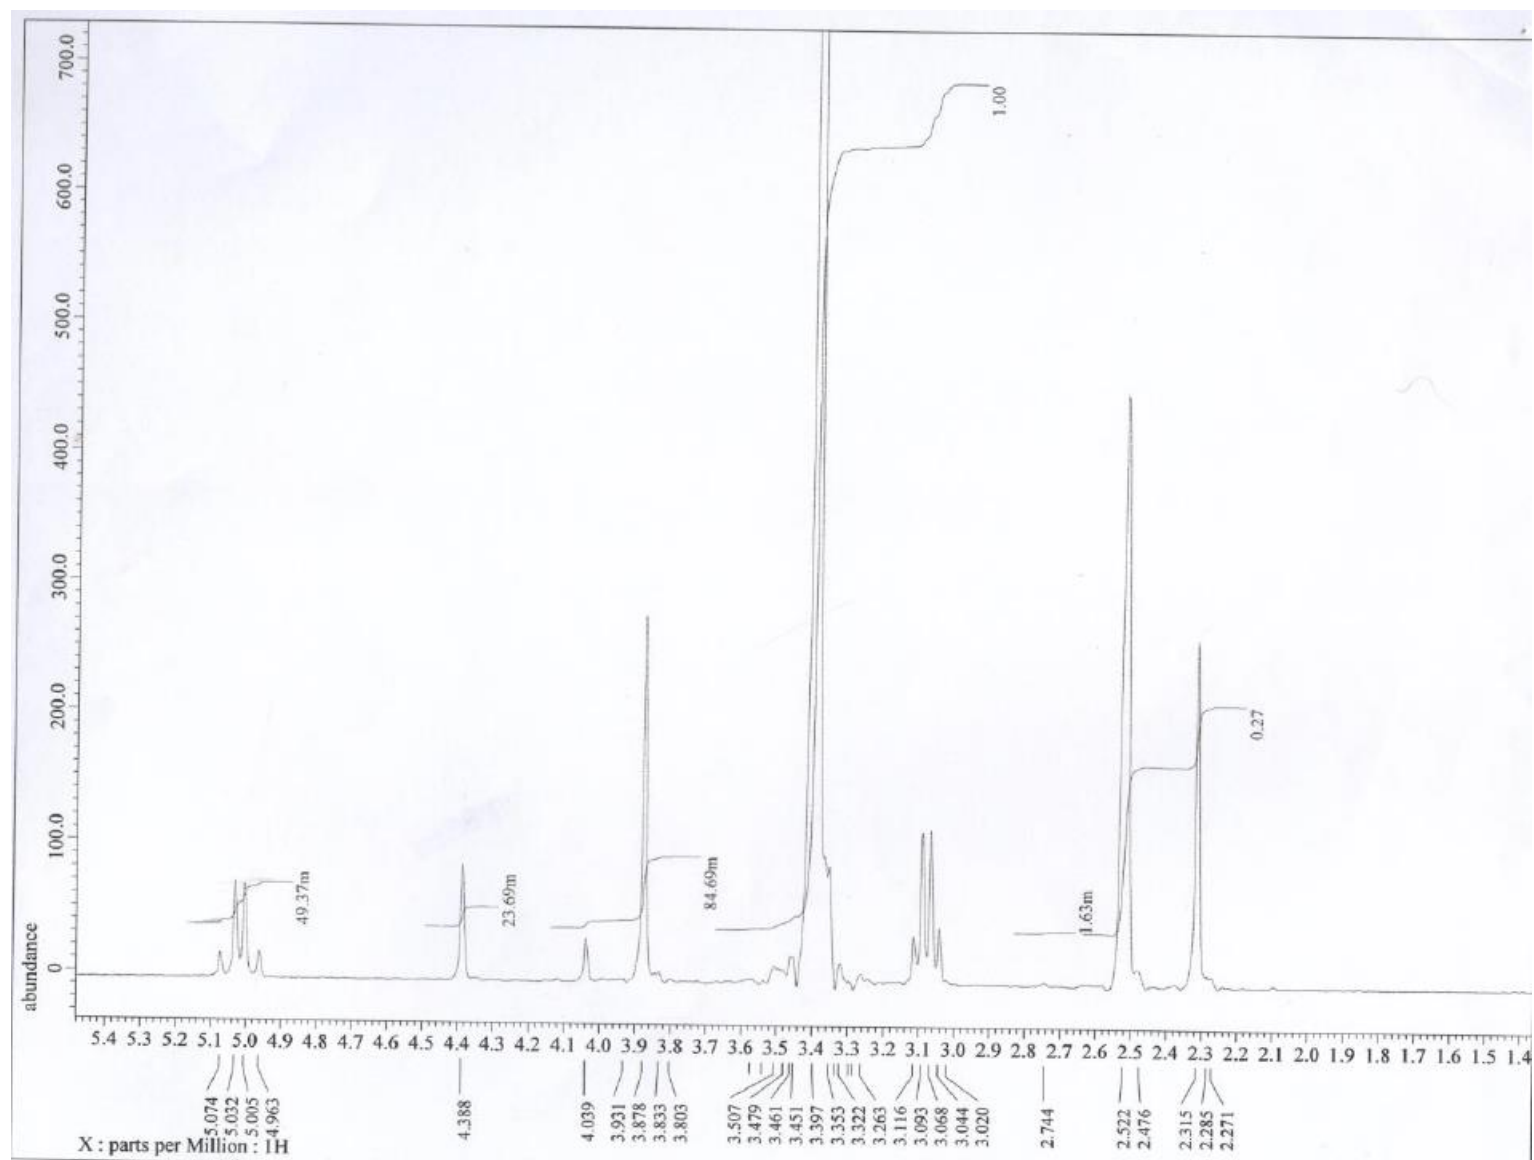

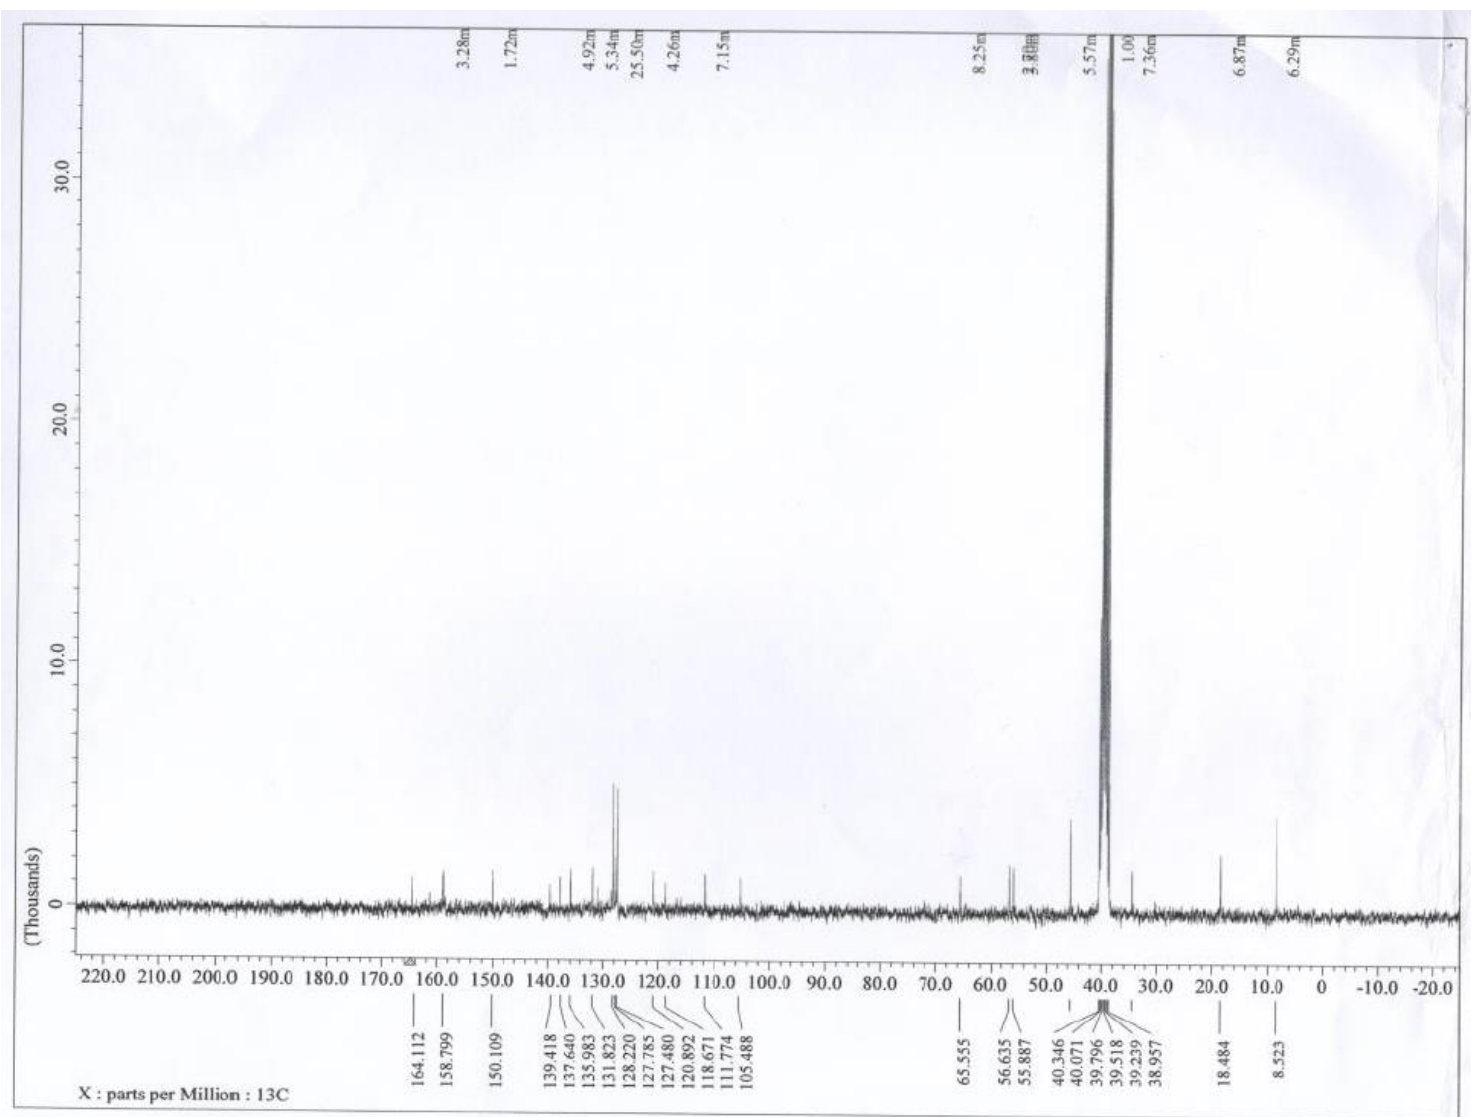

Line#:1 R.Time:6.5(Scan#:776)  
 MassPeaks:290  
 RawMode:Single 6.5(776) BasePeak:91(2876938)  
 BG Mode:None Group 1 - Event 1

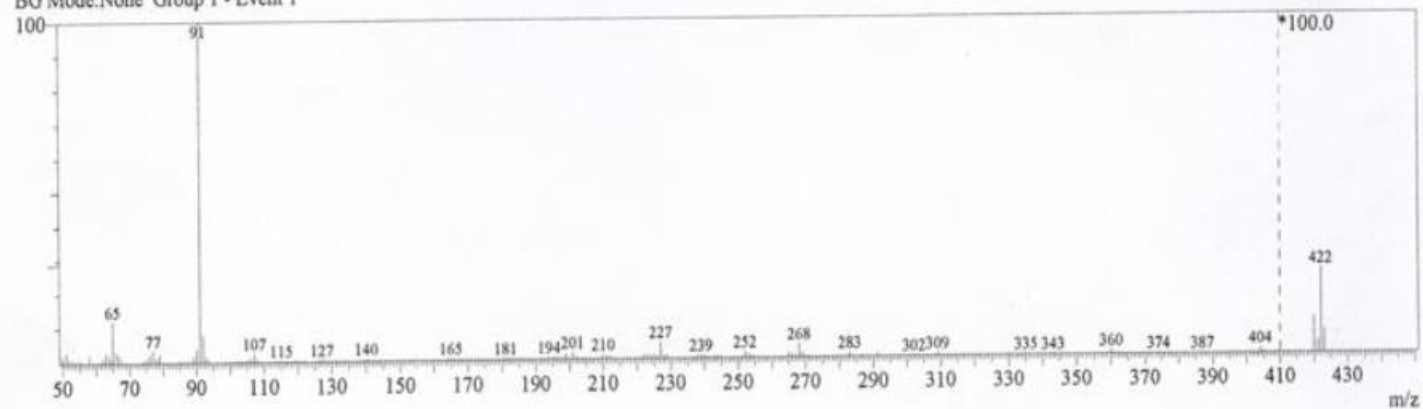

#### Mass Table

Line#:1 R.Time:6.5(Scan#:776)

MassPeaks:290

RawMode:Single 6.5(776) BasePeak:91(2876938)

BG Mode:None Group 1 - Event 1

| # | m/z   | Abs. In | Rel. Int. | # | m/z   | Abs. In | Rel. Int. | # | m/z   | Abs. In | Rel. Int. |
|---|-------|---------|-----------|---|-------|---------|-----------|---|-------|---------|-----------|
| 1 | 50.00 | 42142   | 1.46      | 4 | 53.00 | 25657   | 0.89      | 7 | 56.00 | 2588    | 0.09      |
| 2 | 51.00 | 88790   | 3.09      | 5 | 54.00 | 8666    | 0.30      | 8 | 57.05 | 4124    | 0.14      |
| 3 | 52.00 | 37879   | 1.32      | 6 | 55.00 | 20934   | 0.73      | 9 | 58.00 | 70786   | 2.46      |



| #  | m/z    | Abs. In | Rel. Int. | #   | m/z    | Abs. In | Rel. Int. | #   | m/z    | Abs. In | Rel. Int. |
|----|--------|---------|-----------|-----|--------|---------|-----------|-----|--------|---------|-----------|
| 10 | 59.00  | 16799   | 0.58      | 79  | 131.10 | 6262    | 0.22      | 148 | 200.05 | 12724   | 0.44      |
| 11 | 60.05  | 2242    | 0.08      | 80  | 132.10 | 6415    | 0.22      | 149 | 201.00 | 59105   | 2.05      |
| 12 | 61.05  | 8175    | 0.28      | 81  | 133.10 | 5788    | 0.20      | 150 | 202.00 | 20145   | 0.70      |
| 13 | 62.00  | 36782   | 1.28      | 82  | 134.10 | 13646   | 0.47      | 151 | 203.00 | 10553   | 0.37      |
| 14 | 63.00  | 81118   | 2.82      | 83  | 135.10 | 2930    | 0.10      | 152 | 204.00 | 10769   | 0.37      |
| 15 | 64.05  | 47440   | 1.65      | 84  | 136.10 | 1647    | 0.06      | 153 | 205.00 | 5138    | 0.18      |
| 16 | 65.00  | 347354  | 12.07     | 85  | 137.10 | 2422    | 0.08      | 154 | 206.00 | 4962    | 0.17      |
| 17 | 66.00  | 90618   | 3.15      | 86  | 138.10 | 3236    | 0.11      | 155 | 207.00 | 4775    | 0.17      |
| 18 | 67.00  | 60734   | 2.11      | 87  | 139.10 | 10484   | 0.36      | 156 | 208.00 | 4790    | 0.17      |
| 19 | 68.00  | 8705    | 0.30      | 88  | 140.05 | 22398   | 0.78      | 157 | 209.05 | 12641   | 0.44      |
| 20 | 69.00  | 7254    | 0.25      | 89  | 141.05 | 11555   | 0.40      | 158 | 210.00 | 37836   | 1.32      |
| 21 | 70.05  | 1908    | 0.07      | 90  | 142.10 | 8710    | 0.30      | 159 | 211.00 | 24878   | 0.86      |
| 22 | 71.00  | 1799    | 0.06      | 91  | 143.05 | 7207    | 0.25      | 160 | 212.00 | 22228   | 0.77      |
| 23 | 73.05  | 2138    | 0.07      | 92  | 144.05 | 6078    | 0.21      | 161 | 213.00 | 13057   | 0.45      |
| 24 | 74.00  | 13126   | 0.46      | 93  | 145.10 | 5254    | 0.18      | 162 | 214.00 | 5169    | 0.18      |
| 25 | 75.00  | 31081   | 1.08      | 94  | 146.05 | 8226    | 0.29      | 163 | 215.05 | 4160    | 0.14      |
| 26 | 76.00  | 65564   | 2.28      | 95  | 147.10 | 2791    | 0.10      | 164 | 216.00 | 4857    | 0.17      |
| 27 | 77.05  | 99537   | 3.46      | 96  | 148.05 | 10423   | 0.36      | 165 | 217.00 | 5455    | 0.19      |
| 28 | 78.05  | 38147   | 1.33      | 97  | 149.05 | 4223    | 0.15      | 166 | 218.00 | 3694    | 0.13      |
| 29 | 79.05  | 71165   | 2.47      | 98  | 150.05 | 7238    | 0.25      | 167 | 219.00 | 2378    | 0.08      |
| 30 | 80.05  | 9247    | 0.32      | 99  | 151.05 | 2863    | 0.10      | 168 | 220.00 | 4142    | 0.14      |
| 31 | 81.00  | 2569    | 0.09      | 100 | 152.05 | 7358    | 0.26      | 169 | 221.05 | 4865    | 0.17      |
| 32 | 82.05  | 1019    | 0.04      | 101 | 153.05 | 12486   | 0.43      | 170 | 222.00 | 31751   | 1.10      |
| 33 | 83.00  | 3257    | 0.11      | 102 | 154.05 | 10959   | 0.38      | 171 | 223.00 | 34863   | 1.21      |
| 34 | 84.05  | 2572    | 0.09      | 103 | 155.05 | 11797   | 0.41      | 172 | 224.05 | 20109   | 0.70      |
| 35 | 85.00  | 14740   | 0.51      | 104 | 156.05 | 7560    | 0.26      | 173 | 225.00 | 29622   | 1.03      |
| 36 | 86.05  | 7773    | 0.27      | 105 | 157.05 | 6711    | 0.23      | 174 | 226.05 | 18929   | 0.66      |
| 37 | 87.00  | 15089   | 0.52      | 106 | 158.00 | 6921    | 0.24      | 175 | 227.00 | 137474  | 4.78      |
| 38 | 88.05  | 15599   | 0.54      | 107 | 159.05 | 4619    | 0.16      | 176 | 228.00 | 25255   | 0.88      |
| 39 | 89.05  | 53190   | 1.85      | 108 | 160.00 | 7758    | 0.27      | 177 | 229.00 | 24881   | 0.86      |
| 40 | 90.15  | 112357  | 3.91      | 109 | 161.00 | 6388    | 0.22      | 178 | 230.00 | 5002    | 0.17      |
| 41 | 91.05  | 287693  | 100.00    | 110 | 162.00 | 4500    | 0.16      | 179 | 231.00 | 2238    | 0.08      |
| 42 | 92.05  | 230636  | 8.02      | 111 | 163.05 | 3148    | 0.11      | 180 | 232.05 | 1178    | 0.04      |
| 43 | 93.05  | 40423   | 1.41      | 112 | 164.05 | 15422   | 0.54      | 181 | 233.05 | 1399    | 0.05      |
| 44 | 94.05  | 7636    | 0.27      | 113 | 165.00 | 17342   | 0.60      | 182 | 234.00 | 4242    | 0.15      |
| 45 | 95.05  | 3967    | 0.14      | 114 | 166.00 | 10852   | 0.38      | 183 | 235.05 | 2892    | 0.10      |
| 46 | 97.05  | 1548    | 0.05      | 115 | 167.00 | 10249   | 0.36      | 184 | 236.05 | 4328    | 0.15      |
| 47 | 98.10  | 1519    | 0.05      | 116 | 168.00 | 10831   | 0.38      | 185 | 237.05 | 10533   | 0.37      |
| 48 | 99.05  | 5769    | 0.20      | 117 | 169.00 | 9295    | 0.32      | 186 | 238.05 | 22788   | 0.79      |
| 49 | 100.05 | 8225    | 0.29      | 118 | 170.00 | 9367    | 0.33      | 187 | 239.05 | 25471   | 0.89      |
| 50 | 101.05 | 14189   | 0.49      | 119 | 171.00 | 8498    | 0.30      | 188 | 240.05 | 21438   | 0.75      |
| 51 | 102.05 | 14438   | 0.50      | 120 | 172.00 | 5687    | 0.20      | 189 | 241.05 | 11551   | 0.40      |
| 52 | 103.10 | 9836    | 0.34      | 121 | 173.00 | 9319    | 0.32      | 190 | 242.05 | 5510    | 0.19      |
| 53 | 104.10 | 9887    | 0.34      | 122 | 174.05 | 6148    | 0.21      | 191 | 243.05 | 18237   | 0.63      |
| 54 | 105.10 | 22404   | 0.78      | 123 | 175.00 | 4734    | 0.16      | 192 | 244.05 | 22119   | 0.77      |
| 55 | 106.10 | 27550   | 0.96      | 124 | 176.00 | 3281    | 0.11      | 193 | 245.00 | 12543   | 0.44      |
| 56 | 107.10 | 74871   | 2.60      | 125 | 177.00 | 3540    | 0.12      | 194 | 246.05 | 2874    | 0.10      |
| 57 | 108.10 | 19250   | 0.67      | 126 | 178.00 | 6161    | 0.21      | 195 | 247.05 | 2007    | 0.07      |
| 58 | 109.05 | 2383    | 0.08      | 127 | 179.00 | 7633    | 0.27      | 196 | 248.05 | 3197    | 0.11      |
| 59 | 111.05 | 1120    | 0.04      | 128 | 180.00 | 8591    | 0.30      | 197 | 249.05 | 1998    | 0.07      |
| 60 | 112.10 | 2828    | 0.10      | 129 | 181.05 | 14527   | 0.50      | 198 | 250.10 | 2647    | 0.09      |
| 61 | 113.05 | 12115   | 0.42      | 130 | 182.00 | 11526   | 0.40      | 199 | 251.15 | 8215    | 0.29      |
| 62 | 114.05 | 12893   | 0.45      | 131 | 183.00 | 11242   | 0.39      | 200 | 252.05 | 52577   | 1.83      |
| 63 | 115.10 | 14262   | 0.50      | 132 | 184.00 | 9330    | 0.32      | 201 | 253.05 | 33318   | 1.16      |
| 64 | 116.10 | 9462    | 0.33      | 133 | 185.00 | 10642   | 0.37      | 202 | 254.05 | 19279   | 0.67      |
| 65 | 117.05 | 9417    | 0.33      | 134 | 186.00 | 14289   | 0.50      | 203 | 255.05 | 17162   | 0.60      |
| 66 | 118.10 | 5961    | 0.21      | 135 | 187.00 | 6441    | 0.22      | 204 | 256.05 | 6925    | 0.24      |
| 67 | 119.05 | 11809   | 0.41      | 136 | 188.00 | 7345    | 0.26      | 205 | 257.05 | 2839    | 0.10      |
| 68 | 120.05 | 13754   | 0.48      | 137 | 189.00 | 4554    | 0.16      | 206 | 258.05 | 1664    | 0.06      |
| 69 | 121.10 | 8554    | 0.30      | 138 | 190.00 | 2655    | 0.09      | 207 | 259.10 | 1710    | 0.06      |
| 70 | 122.05 | 3061    | 0.11      | 139 | 191.00 | 1910    | 0.07      | 208 | 260.10 | 1878    | 0.07      |
| 71 | 123.05 | 1181    | 0.04      | 140 | 192.00 | 5542    | 0.19      | 209 | 261.05 | 1698    | 0.06      |
| 72 | 124.15 | 1123    | 0.04      | 141 | 193.05 | 5085    | 0.18      | 210 | 262.05 | 1403    | 0.05      |
| 73 | 125.15 | 3772    | 0.13      | 142 | 194.00 | 18534   | 0.64      | 211 | 263.10 | 3169    | 0.11      |
| 74 | 126.10 | 13775   | 0.48      | 143 | 195.00 | 16514   | 0.57      | 212 | 264.05 | 1663    | 0.06      |
| 75 | 127.10 | 15196   | 0.53      | 144 | 196.00 | 15449   | 0.54      | 213 | 265.05 | 44634   | 1.55      |
| 76 | 128.05 | 12890   | 0.45      | 145 | 197.00 | 17388   | 0.60      | 214 | 266.05 | 28014   | 0.97      |
| 77 | 129.10 | 8782    | 0.31      | 146 | 198.05 | 15771   | 0.55      | 215 | 267.15 | 15280   | 0.53      |
| 78 | 130.10 | 9097    | 0.32      | 147 | 199.00 | 48042   | 1.67      | 216 | 268.05 | 113410  | 3.94      |



| #   | m/z    | Abs. In | Rel. Int. | #   | m/z    | Abs. In | Rel. Int. | #   | m/z    | Abs. In | Rel. Int. |
|-----|--------|---------|-----------|-----|--------|---------|-----------|-----|--------|---------|-----------|
| 217 | 269.05 | 46480   | 1.62      | 242 | 297.05 | 2257    | 0.08      | 267 | 336.05 | 2260    | 0.08      |
| 218 | 270.05 | 11435   | 0.40      | 243 | 298.05 | 1962    | 0.07      | 268 | 342.10 | 3346    | 0.12      |
| 219 | 271.00 | 9975    | 0.35      | 244 | 299.05 | 3682    | 0.13      | 269 | 343.05 | 5674    | 0.20      |
| 220 | 272.05 | 4054    | 0.14      | 245 | 300.05 | 3583    | 0.12      | 270 | 344.05 | 3603    | 0.13      |
| 221 | 273.05 | 2987    | 0.10      | 246 | 301.05 | 3522    | 0.12      | 271 | 345.05 | 1551    | 0.05      |
| 222 | 274.05 | 2539    | 0.09      | 247 | 302.05 | 4851    | 0.17      | 272 | 357.05 | 1830    | 0.06      |
| 223 | 275.10 | 5218    | 0.18      | 248 | 303.05 | 2107    | 0.07      | 273 | 358.05 | 1072    | 0.04      |
| 224 | 276.05 | 7554    | 0.26      | 249 | 309.10 | 21812   | 0.76      | 274 | 359.15 | 1333    | 0.05      |
| 225 | 277.05 | 2032    | 0.07      | 250 | 310.05 | 5457    | 0.19      | 275 | 360.10 | 30857   | 1.07      |
| 226 | 278.05 | 1186    | 0.04      | 251 | 311.05 | 1439    | 0.05      | 276 | 361.05 | 8081    | 0.28      |
| 227 | 280.05 | 2198    | 0.08      | 252 | 312.05 | 1309    | 0.05      | 277 | 362.10 | 2148    | 0.07      |
| 228 | 281.05 | 1738    | 0.06      | 253 | 313.10 | 1430    | 0.05      | 278 | 374.05 | 7284    | 0.25      |
| 229 | 282.05 | 3002    | 0.10      | 254 | 314.05 | 2785    | 0.10      | 279 | 375.05 | 2454    | 0.09      |
| 230 | 283.05 | 36659   | 1.27      | 255 | 315.10 | 4049    | 0.14      | 280 | 376.05 | 1997    | 0.07      |
| 231 | 284.05 | 8954    | 0.31      | 256 | 316.15 | 2257    | 0.08      | 281 | 387.00 | 2233    | 0.08      |
| 232 | 285.05 | 4221    | 0.15      | 257 | 317.05 | 10417   | 0.36      | 282 | 388.05 | 1036    | 0.04      |
| 233 | 286.05 | 5109    | 0.18      | 258 | 318.05 | 3350    | 0.12      | 283 | 403.15 | 1950    | 0.07      |
| 234 | 287.05 | 3839    | 0.13      | 259 | 328.05 | 1798    | 0.06      | 284 | 404.05 | 42596   | 1.48      |
| 235 | 288.05 | 3628    | 0.13      | 260 | 329.05 | 1409    | 0.05      | 285 | 405.05 | 10889   | 0.38      |
| 236 | 289.10 | 3233    | 0.11      | 261 | 330.05 | 7014    | 0.24      | 286 | 406.10 | 1762    | 0.06      |
| 237 | 290.15 | 3492    | 0.12      | 262 | 331.05 | 2520    | 0.09      | 287 | 420.05 | 3029    | 0.11      |
| 238 | 291.10 | 33364   | 1.16      | 263 | 332.05 | 1517    | 0.05      | 288 | 421.15 | 1043    | 0.04      |
| 239 | 292.10 | 7265    | 0.25      | 264 | 333.10 | 1196    | 0.04      | 289 | 422.10 | 7140    | 0.25      |
| 240 | 293.10 | 1158    | 0.04      | 265 | 334.15 | 2454    | 0.09      | 290 | 423.05 | 1929    | 0.07      |
| 241 | 296.00 | 1705    | 0.06      | 266 | 335.05 | 10236   | 0.36      |     |        |         |           |

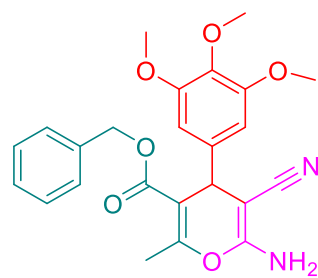

**Compound 4d**

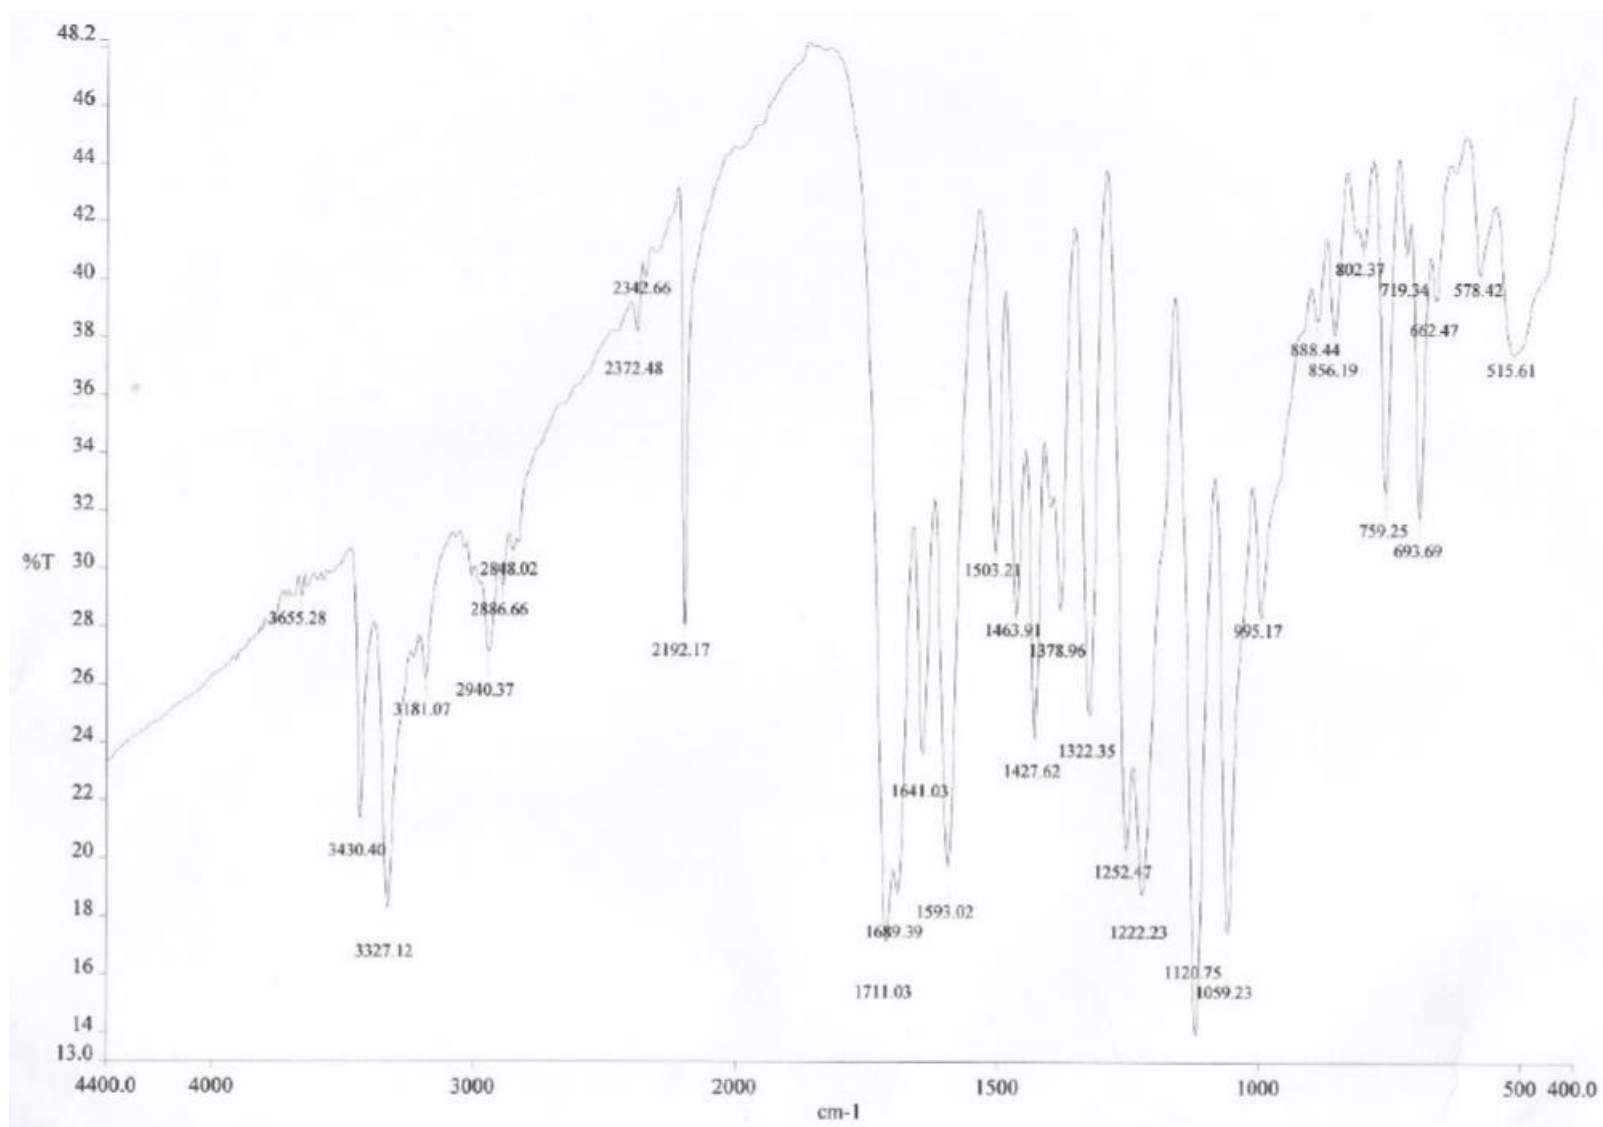

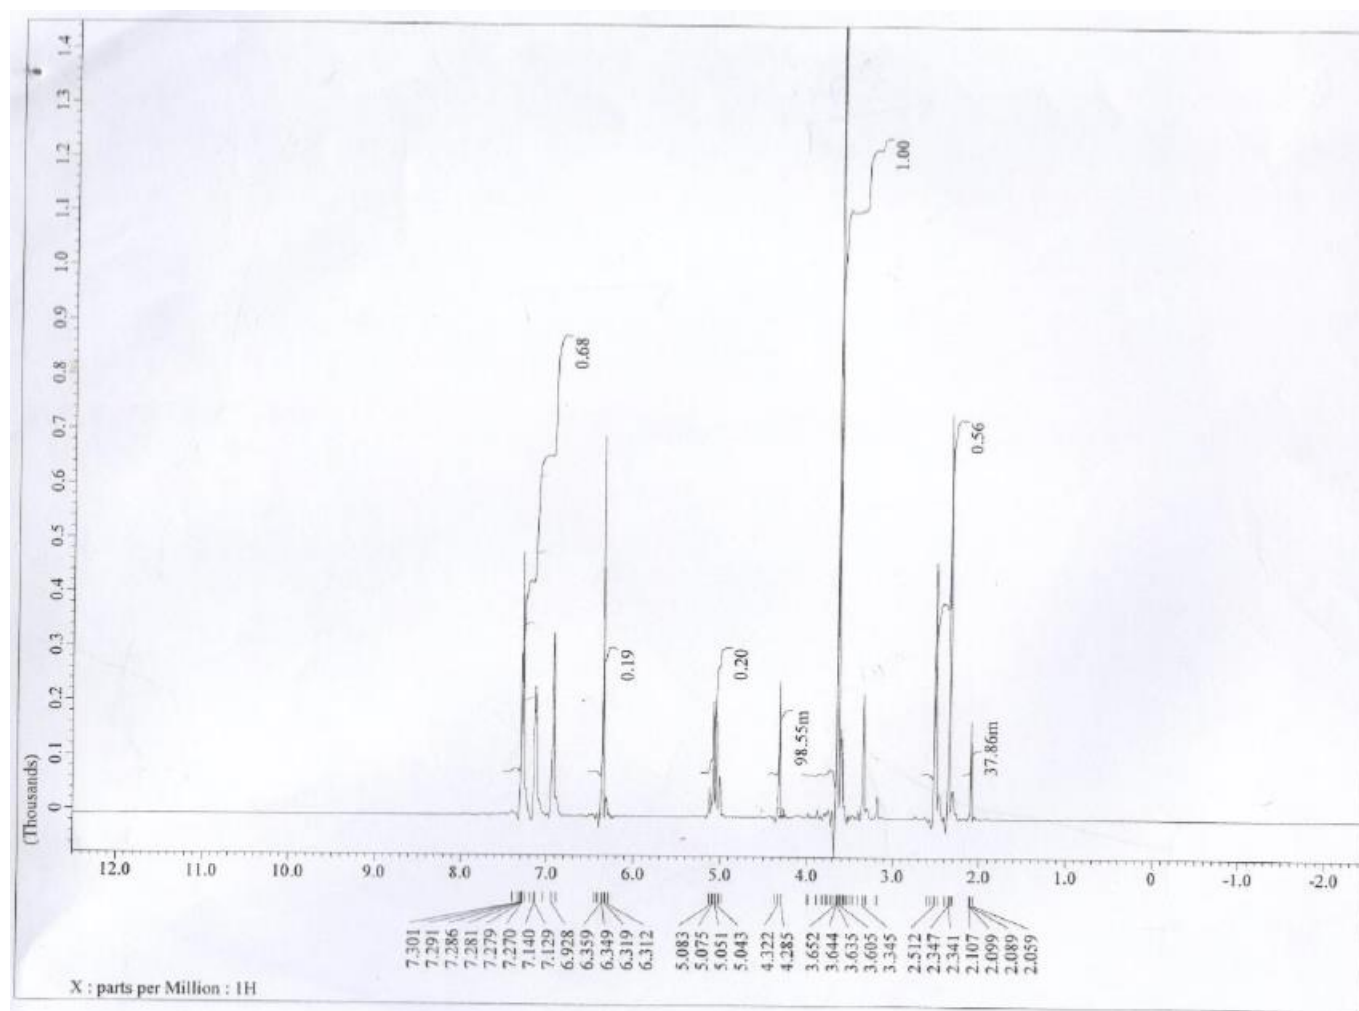

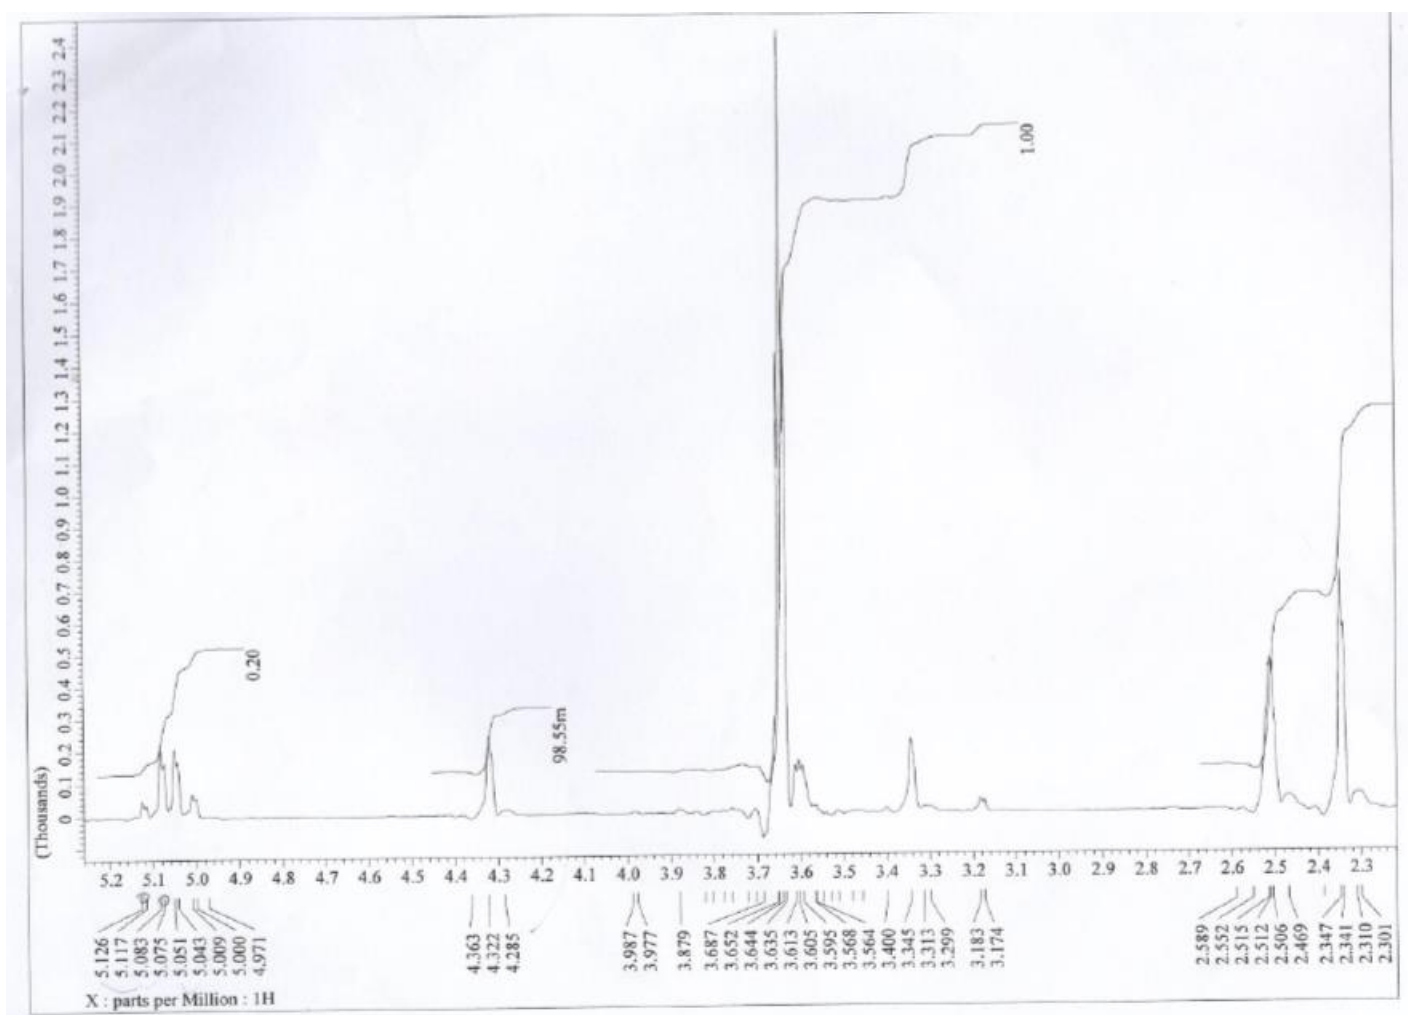

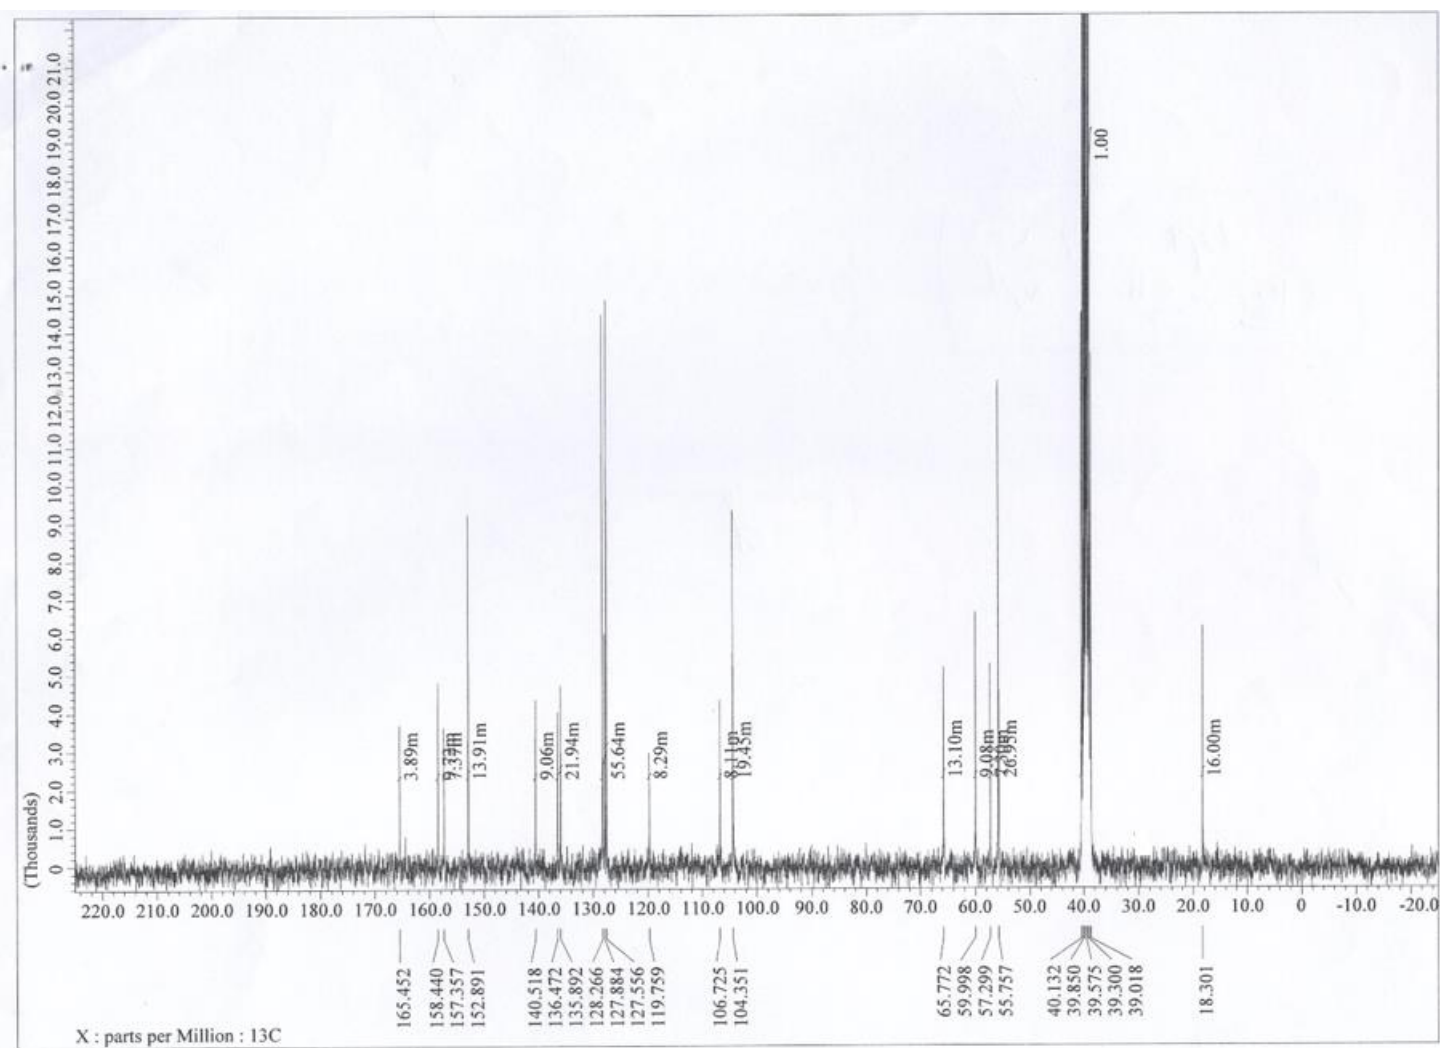

Line#:1 R.Time:3.5(Scan#:421)  
 MassPeaks:284  
 RawMode:Single 3.5(421) BasePeak:91(1421659)  
 BG Mode:None Group 1 - Event 1

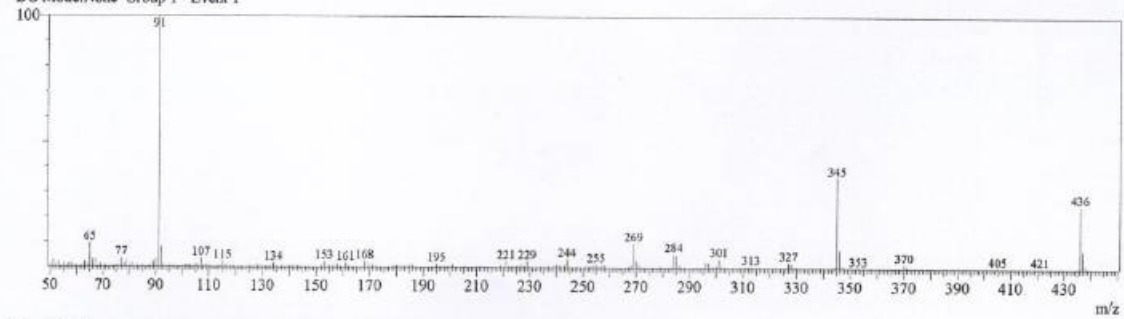

#### Mass Table

Line#:1 R.Time:3.5(Scan#:421)

MassPeaks:284

RawMode:Single 3.5(421) BasePeak:91(1421659)

BG Mode:None Group 1 - Event 1

| # | m/z   | Abs. In | Rel. Int. | # | m/z   | Abs. In | Rel. Int. | # | m/z   | Abs. In | Rel. Int. |
|---|-------|---------|-----------|---|-------|---------|-----------|---|-------|---------|-----------|
| 1 | 50.00 | 16417   | 1.15      | 4 | 53.00 | 30078   | 2.12      | 7 | 56.05 | 5658    | 0.40      |
| 2 | 51.00 | 34822   | 2.45      | 5 | 54.05 | 5384    | 0.38      | 8 | 57.05 | 20646   | 1.45      |
| 3 | 52.05 | 14154   | 1.00      | 6 | 55.00 | 20806   | 1.46      | 9 | 58.00 | 19583   | 1.38      |



| #  | m/z    | Abs. Int. | Rel. Int. | #   | m/z    | Abs. Int. | Rel. Int. | #   | m/z    | Abs. Int. | Rel. Int. |
|----|--------|-----------|-----------|-----|--------|-----------|-----------|-----|--------|-----------|-----------|
| 10 | 59.00  | 9838      | 0.69      | 79  | 128.05 | 12791     | 0.90      | 148 | 197.00 | 7390      | 0.52      |
| 11 | 60.00  | 5751      | 0.40      | 80  | 129.05 | 10260     | 0.72      | 149 | 198.00 | 6809      | 0.48      |
| 12 | 61.00  | 3999      | 0.28      | 81  | 130.05 | 7826      | 0.55      | 150 | 199.00 | 8866      | 0.62      |
| 13 | 62.05  | 7849      | 0.55      | 82  | 131.05 | 6852      | 0.48      | 151 | 200.00 | 9071      | 0.64      |
| 14 | 63.00  | 30351     | 2.13      | 83  | 132.05 | 4511      | 0.32      | 152 | 200.95 | 18001     | 1.27      |
| 15 | 64.05  | 19015     | 1.34      | 84  | 133.05 | 10013     | 0.70      | 153 | 202.00 | 5535      | 0.39      |
| 16 | 65.00  | 132002    | 9.29      | 85  | 134.05 | 22366     | 1.57      | 154 | 202.95 | 3402      | 0.24      |
| 17 | 66.00  | 43871     | 3.09      | 86  | 135.05 | 6895      | 0.48      | 155 | 204.00 | 3350      | 0.24      |
| 18 | 67.00  | 46948     | 3.30      | 87  | 136.05 | 1930      | 0.14      | 156 | 205.00 | 7159      | 0.50      |
| 19 | 68.00  | 6567      | 0.46      | 88  | 137.05 | 7909      | 0.56      | 157 | 205.95 | 8957      | 0.63      |
| 20 | 69.00  | 17145     | 1.21      | 89  | 138.05 | 3375      | 0.24      | 158 | 207.00 | 3775      | 0.27      |
| 21 | 70.10  | 3879      | 0.27      | 90  | 139.10 | 5937      | 0.42      | 159 | 208.00 | 6223      | 0.44      |
| 22 | 71.05  | 9579      | 0.67      | 91  | 140.05 | 9834      | 0.69      | 160 | 209.00 | 5322      | 0.37      |
| 23 | 72.05  | 1386      | 0.10      | 92  | 141.05 | 9763      | 0.69      | 161 | 210.00 | 7070      | 0.50      |
| 24 | 73.00  | 5844      | 0.41      | 93  | 142.05 | 6782      | 0.48      | 162 | 210.95 | 9656      | 0.68      |
| 25 | 74.05  | 4466      | 0.31      | 94  | 143.05 | 9266      | 0.65      | 163 | 212.00 | 8545      | 0.60      |
| 26 | 75.00  | 11596     | 0.82      | 95  | 144.05 | 7705      | 0.54      | 164 | 213.00 | 7340      | 0.52      |
| 27 | 76.05  | 14067     | 0.99      | 96  | 145.05 | 6114      | 0.43      | 165 | 214.00 | 6862      | 0.48      |
| 28 | 77.00  | 49249     | 3.46      | 97  | 146.05 | 4383      | 0.31      | 166 | 215.00 | 6857      | 0.48      |
| 29 | 78.05  | 17589     | 1.24      | 98  | 147.05 | 4356      | 0.31      | 167 | 216.00 | 4178      | 0.29      |
| 30 | 79.00  | 35305     | 2.48      | 99  | 148.05 | 2731      | 0.19      | 168 | 216.95 | 3626      | 0.26      |
| 31 | 80.05  | 5666      | 0.40      | 100 | 149.05 | 4816      | 0.34      | 169 | 218.00 | 3226      | 0.23      |
| 32 | 81.05  | 20700     | 1.46      | 101 | 150.05 | 2147      | 0.15      | 170 | 219.00 | 13375     | 0.94      |
| 33 | 82.05  | 4578      | 0.32      | 102 | 151.05 | 3737      | 0.26      | 171 | 220.05 | 3648      | 0.26      |
| 34 | 83.05  | 7561      | 0.53      | 103 | 152.05 | 7186      | 0.51      | 172 | 221.00 | 33553     | 2.36      |
| 35 | 84.05  | 4506      | 0.32      | 104 | 153.00 | 29868     | 2.10      | 173 | 222.00 | 8522      | 0.60      |
| 36 | 85.05  | 11348     | 0.80      | 105 | 154.00 | 10734     | 0.76      | 174 | 223.00 | 9566      | 0.67      |
| 37 | 86.00  | 2946      | 0.21      | 106 | 155.00 | 9927      | 0.70      | 175 | 224.00 | 7849      | 0.55      |
| 38 | 87.00  | 5764      | 0.41      | 107 | 156.00 | 8934      | 0.63      | 176 | 225.00 | 11353     | 0.80      |
| 39 | 88.00  | 10929     | 0.77      | 108 | 157.00 | 8858      | 0.62      | 177 | 225.95 | 12189     | 0.86      |
| 40 | 89.00  | 28300     | 1.99      | 109 | 158.00 | 17556     | 1.23      | 178 | 227.00 | 20292     | 1.43      |
| 41 | 90.05  | 42923     | 3.02      | 110 | 159.00 | 6710      | 0.47      | 179 | 228.00 | 10273     | 0.72      |
| 42 | 91.05  | 142165    | 100.00    | 111 | 160.05 | 3789      | 0.27      | 180 | 229.00 | 34004     | 2.39      |
| 43 | 92.05  | 115599    | 8.13      | 112 | 161.00 | 23513     | 1.65      | 181 | 229.95 | 8142      | 0.57      |
| 44 | 93.00  | 15351     | 1.08      | 113 | 162.00 | 6953      | 0.49      | 182 | 231.00 | 4401      | 0.31      |
| 45 | 94.05  | 4861      | 0.34      | 114 | 163.00 | 6225      | 0.44      | 183 | 232.00 | 2473      | 0.17      |
| 46 | 95.05  | 10198     | 0.72      | 115 | 164.05 | 6294      | 0.44      | 184 | 233.00 | 4874      | 0.34      |
| 47 | 96.10  | 5086      | 0.36      | 116 | 165.00 | 4503      | 0.32      | 185 | 234.00 | 7090      | 0.50      |
| 48 | 97.05  | 7006      | 0.49      | 117 | 166.00 | 3268      | 0.23      | 186 | 235.00 | 6638      | 0.47      |
| 49 | 98.05  | 4183      | 0.29      | 118 | 167.05 | 5055      | 0.36      | 187 | 236.00 | 8090      | 0.57      |
| 50 | 99.05  | 5111      | 0.36      | 119 | 168.00 | 32431     | 2.28      | 188 | 237.00 | 9415      | 0.66      |
| 51 | 100.00 | 7138      | 0.50      | 120 | 169.00 | 17681     | 1.24      | 189 | 238.00 | 7449      | 0.52      |
| 52 | 101.00 | 12394     | 0.87      | 121 | 170.00 | 8738      | 0.61      | 190 | 239.00 | 12734     | 0.90      |
| 53 | 102.05 | 12492     | 0.88      | 122 | 171.00 | 14490     | 1.02      | 191 | 240.00 | 17095     | 1.20      |
| 54 | 103.05 | 11579     | 0.81      | 123 | 172.00 | 9857      | 0.69      | 192 | 241.00 | 15052     | 1.06      |
| 55 | 104.10 | 6551      | 0.46      | 124 | 172.95 | 6898      | 0.49      | 193 | 242.00 | 11953     | 0.84      |
| 56 | 105.05 | 17530     | 1.23      | 125 | 174.00 | 4505      | 0.32      | 194 | 243.05 | 14401     | 1.01      |
| 57 | 106.05 | 10605     | 0.75      | 126 | 175.00 | 3559      | 0.25      | 195 | 244.00 | 47415     | 3.34      |
| 58 | 107.05 | 47321     | 3.33      | 127 | 176.00 | 2938      | 0.21      | 196 | 245.00 | 10012     | 0.70      |
| 59 | 108.05 | 11821     | 0.83      | 128 | 176.95 | 4984      | 0.35      | 197 | 246.00 | 3196      | 0.22      |
| 60 | 109.05 | 15308     | 1.08      | 129 | 178.00 | 6518      | 0.46      | 198 | 247.00 | 4297      | 0.30      |
| 61 | 110.05 | 7499      | 0.53      | 130 | 178.95 | 11311     | 0.80      | 199 | 248.00 | 6086      | 0.43      |
| 62 | 111.10 | 4602      | 0.32      | 131 | 180.00 | 11470     | 0.81      | 200 | 249.00 | 3834      | 0.27      |
| 63 | 112.10 | 2841      | 0.20      | 132 | 181.00 | 8881      | 0.62      | 201 | 250.05 | 1764      | 0.12      |
| 64 | 113.05 | 6273      | 0.44      | 133 | 182.00 | 9361      | 0.66      | 202 | 251.00 | 12260     | 0.86      |
| 65 | 114.05 | 9747      | 0.69      | 134 | 183.00 | 8583      | 0.60      | 203 | 252.00 | 8940      | 0.63      |
| 66 | 115.05 | 30877     | 2.17      | 135 | 184.00 | 8900      | 0.63      | 204 | 253.00 | 15105     | 1.06      |
| 67 | 116.05 | 13010     | 0.92      | 136 | 185.00 | 14049     | 0.99      | 205 | 254.00 | 14454     | 1.02      |
| 68 | 117.05 | 10187     | 0.72      | 137 | 185.95 | 13281     | 0.93      | 206 | 255.00 | 17394     | 1.22      |
| 69 | 118.05 | 5813      | 0.41      | 138 | 186.95 | 5783      | 0.41      | 207 | 256.00 | 11180     | 0.79      |
| 70 | 119.05 | 7000      | 0.49      | 139 | 187.95 | 4408      | 0.31      | 208 | 257.05 | 15801     | 1.11      |
| 71 | 120.05 | 3300      | 0.23      | 140 | 189.00 | 3599      | 0.25      | 209 | 258.05 | 13862     | 0.98      |
| 72 | 121.05 | 5157      | 0.36      | 141 | 190.00 | 3476      | 0.24      | 210 | 259.00 | 6529      | 0.46      |
| 73 | 122.05 | 4383      | 0.31      | 142 | 190.95 | 3311      | 0.23      | 211 | 260.05 | 2898      | 0.20      |
| 74 | 123.05 | 3499      | 0.25      | 143 | 192.00 | 3118      | 0.22      | 212 | 261.00 | 3342      | 0.24      |
| 75 | 124.05 | 2943      | 0.21      | 144 | 193.00 | 4743      | 0.33      | 213 | 262.05 | 2487      | 0.17      |
| 76 | 125.05 | 8581      | 0.60      | 145 | 194.00 | 4239      | 0.30      | 214 | 263.00 | 4575      | 0.32      |
| 77 | 126.05 | 5127      | 0.36      | 146 | 194.95 | 19524     | 1.37      | 215 | 264.00 | 2044      | 0.14      |
| 78 | 127.05 | 11877     | 0.84      | 147 | 196.00 | 8566      | 0.60      | 216 | 265.05 | 2354      | 0.17      |

| #   | m/z    | Abs. In | Rel. Int. | #   | m/z    | Abs. In | Rel. Int. | #   | m/z    | Abs. In | Rel. Int. |
|-----|--------|---------|-----------|-----|--------|---------|-----------|-----|--------|---------|-----------|
| 217 | 266.00 | 3460    | 0.24      | 240 | 295.05 | 3289    | 0.23      | 263 | 330.00 | 5634    | 0.40      |
| 218 | 267.00 | 8970    | 0.63      | 241 | 296.00 | 32490   | 2.29      | 264 | 331.00 | 1713    | 0.12      |
| 219 | 268.05 | 16966   | 1.19      | 242 | 297.00 | 30666   | 2.16      | 265 | 339.00 | 4470    | 0.31      |
| 220 | 269.05 | 137905  | 9.70      | 243 | 297.95 | 8769    | 0.62      | 266 | 340.00 | 1302    | 0.09      |
| 221 | 270.00 | 42678   | 3.00      | 244 | 299.00 | 8458    | 0.59      | 267 | 344.05 | 9200    | 0.65      |
| 222 | 271.00 | 18372   | 1.29      | 245 | 300.05 | 14387   | 1.01      | 268 | 345.00 | 514161  | 36.17     |
| 223 | 272.00 | 7065    | 0.50      | 246 | 301.05 | 50508   | 3.55      | 269 | 346.00 | 102474  | 7.21      |
| 224 | 273.05 | 2592    | 0.18      | 247 | 302.00 | 15559   | 1.09      | 270 | 347.00 | 16686   | 1.17      |
| 225 | 274.00 | 1354    | 0.10      | 248 | 303.00 | 4839    | 0.34      | 271 | 348.00 | 2228    | 0.16      |
| 226 | 275.05 | 1805    | 0.13      | 249 | 304.00 | 1046    | 0.07      | 272 | 353.05 | 1021    | 0.07      |
| 227 | 276.05 | 1501    | 0.11      | 250 | 309.00 | 2014    | 0.14      | 273 | 369.05 | 1405    | 0.10      |
| 228 | 278.05 | 1275    | 0.09      | 251 | 310.00 | 2156    | 0.15      | 274 | 370.00 | 24138   | 1.70      |
| 229 | 279.00 | 10719   | 0.75      | 252 | 311.00 | 5385    | 0.38      | 275 | 371.00 | 6089    | 0.43      |
| 230 | 280.00 | 2969    | 0.21      | 253 | 312.00 | 6778    | 0.48      | 276 | 372.00 | 1364    | 0.10      |
| 231 | 281.00 | 5566    | 0.39      | 254 | 313.00 | 8745    | 0.62      | 277 | 393.00 | 1713    | 0.12      |
| 232 | 282.00 | 4290    | 0.30      | 255 | 314.00 | 3364    | 0.24      | 278 | 405.00 | 3318    | 0.23      |
| 233 | 283.05 | 8215    | 0.58      | 256 | 315.00 | 3092    | 0.22      | 279 | 421.00 | 1383    | 0.10      |
| 234 | 284.00 | 78078   | 5.49      | 257 | 316.00 | 1194    | 0.08      | 280 | 435.05 | 8309    | 0.58      |
| 235 | 285.00 | 69441   | 4.88      | 258 | 317.00 | 1308    | 0.09      | 281 | 436.05 | 353768  | 24.88     |
| 236 | 286.00 | 17247   | 1.21      | 259 | 326.05 | 1388    | 0.10      | 282 | 437.05 | 99249   | 6.98      |
| 237 | 287.00 | 7780    | 0.55      | 260 | 327.00 | 29538   | 2.08      | 283 | 438.05 | 17851   | 1.26      |
| 238 | 288.00 | 2799    | 0.20      | 261 | 328.00 | 27198   | 1.91      | 284 | 439.05 | 2519    | 0.18      |
| 239 | 293.95 | 3144    | 0.22      | 262 | 329.00 | 12684   | 0.89      |     |        |         |           |

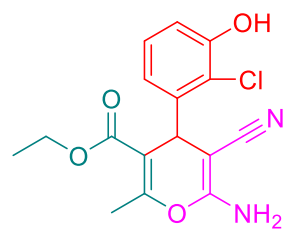

**Compound 4g**

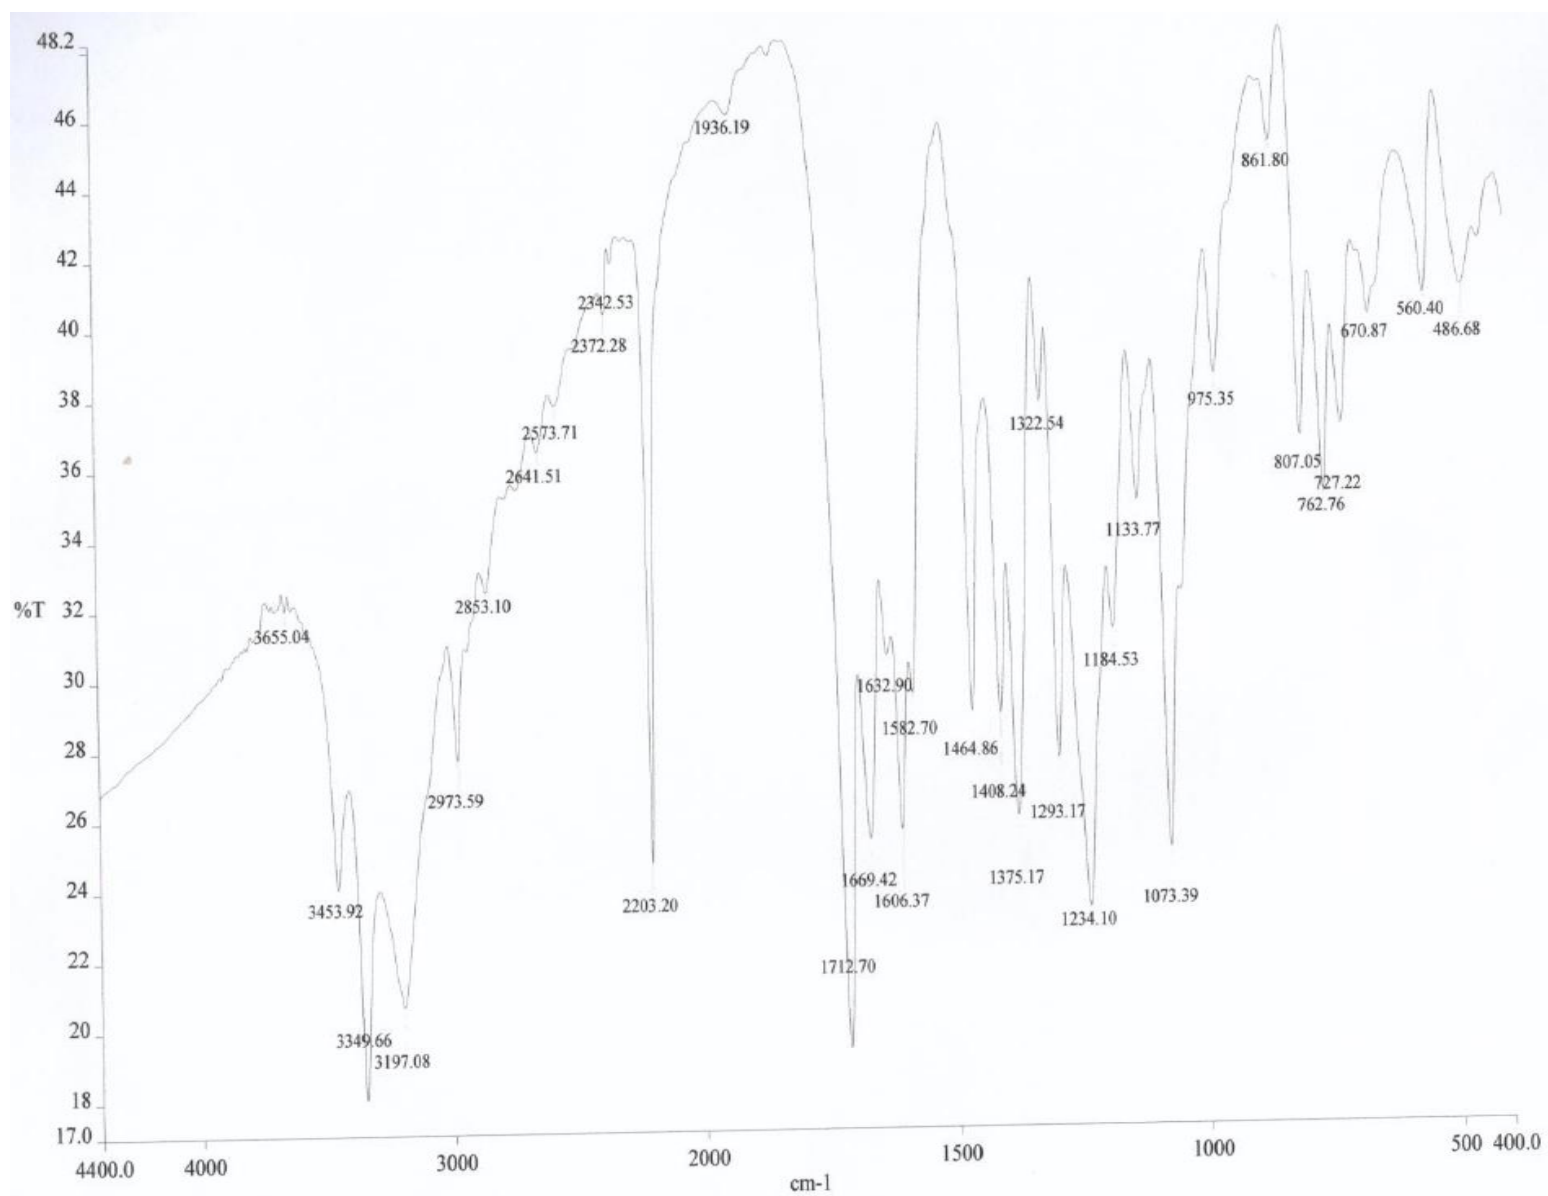

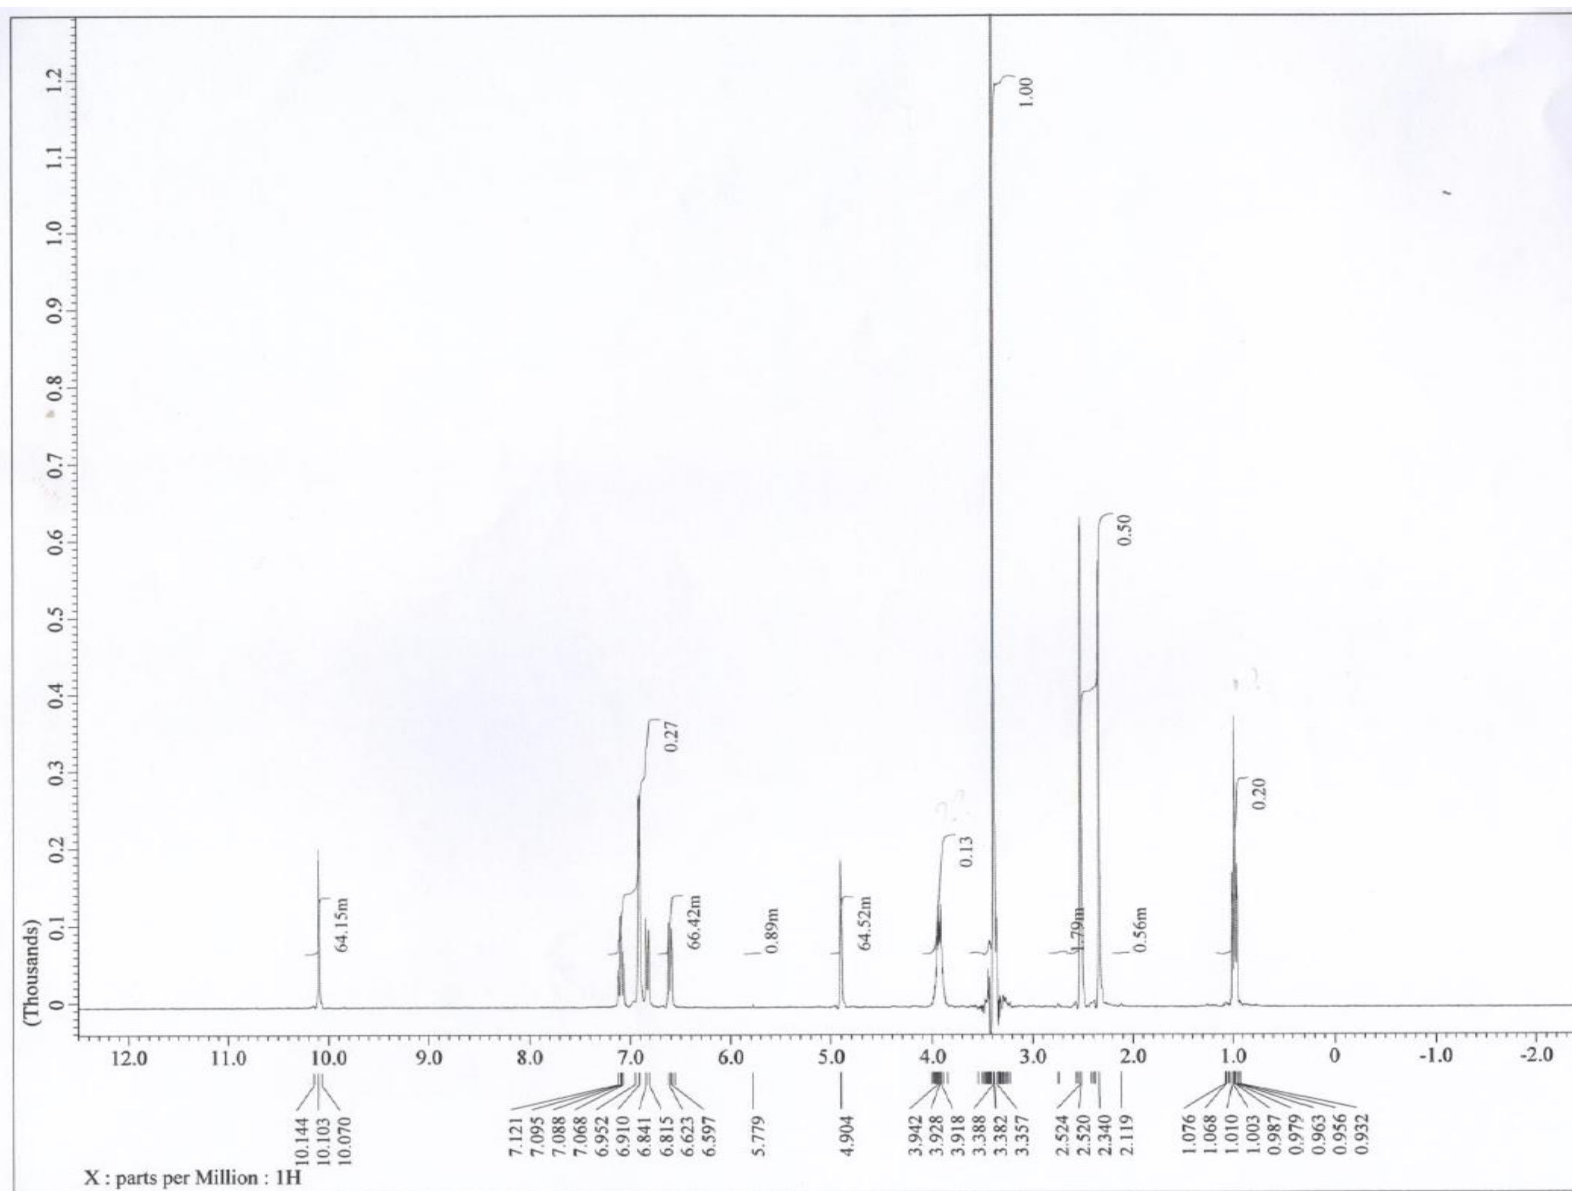

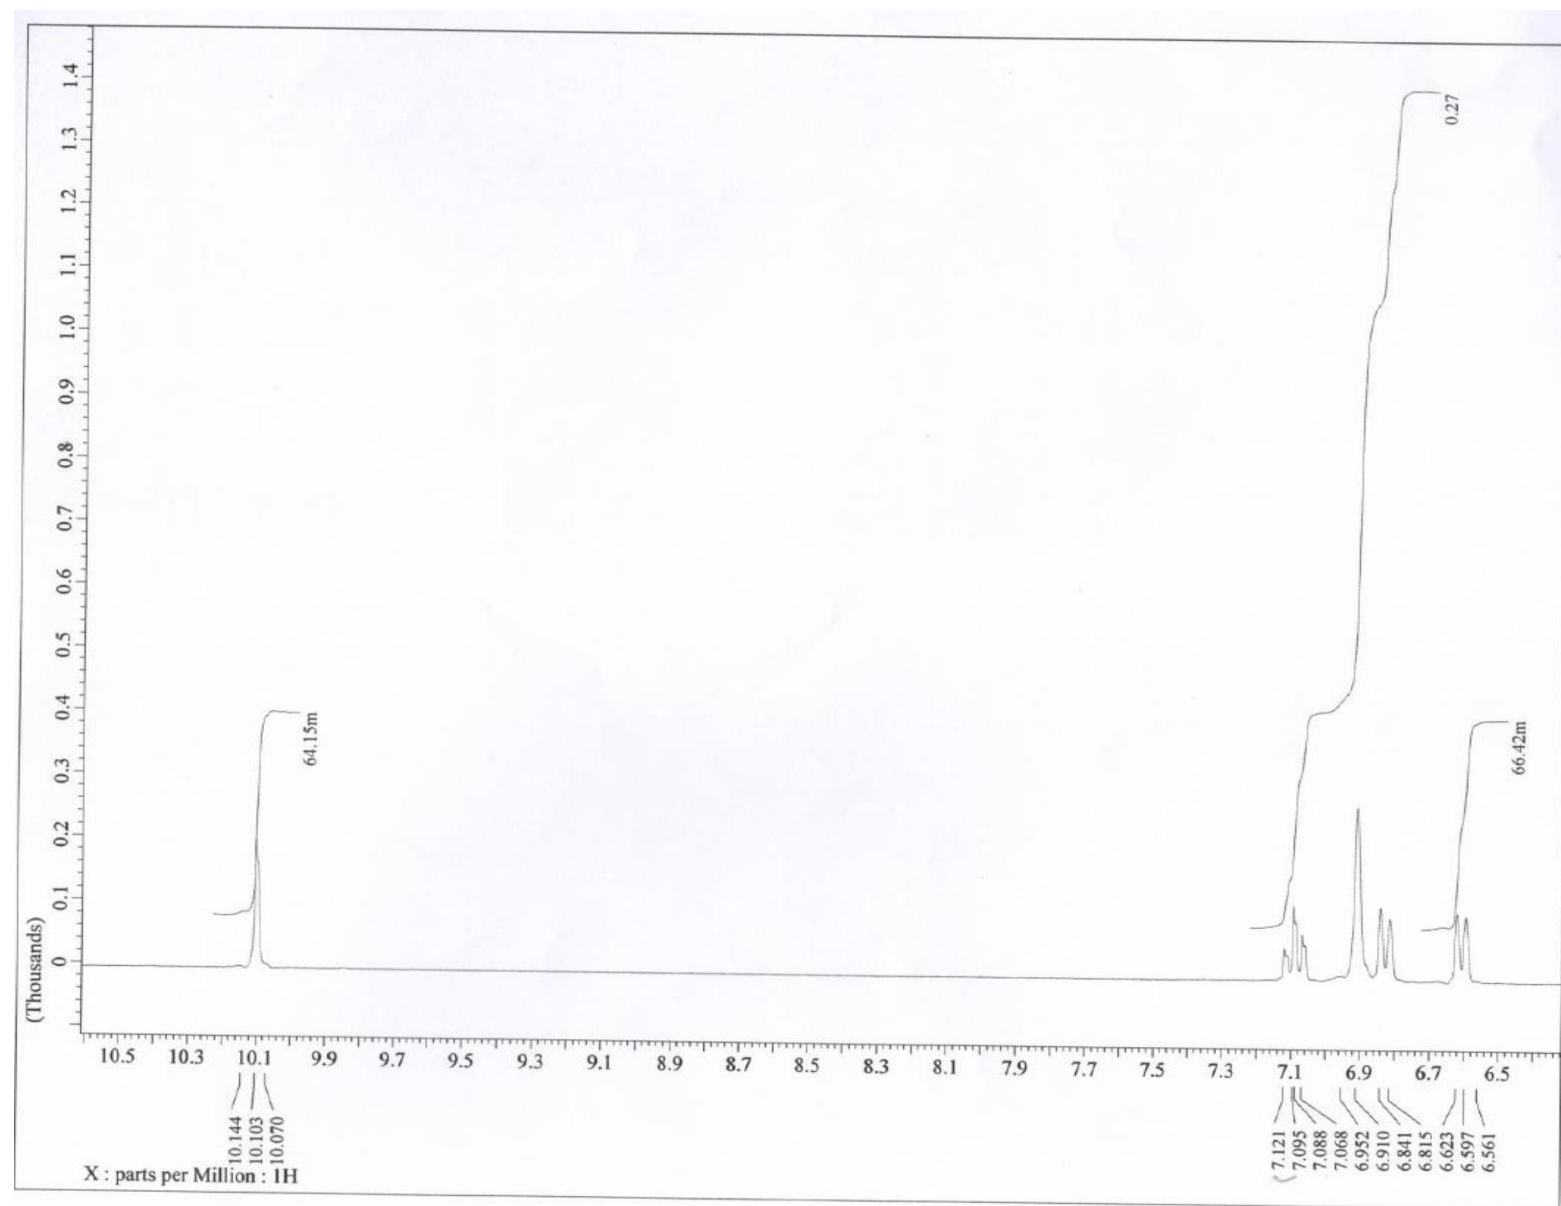

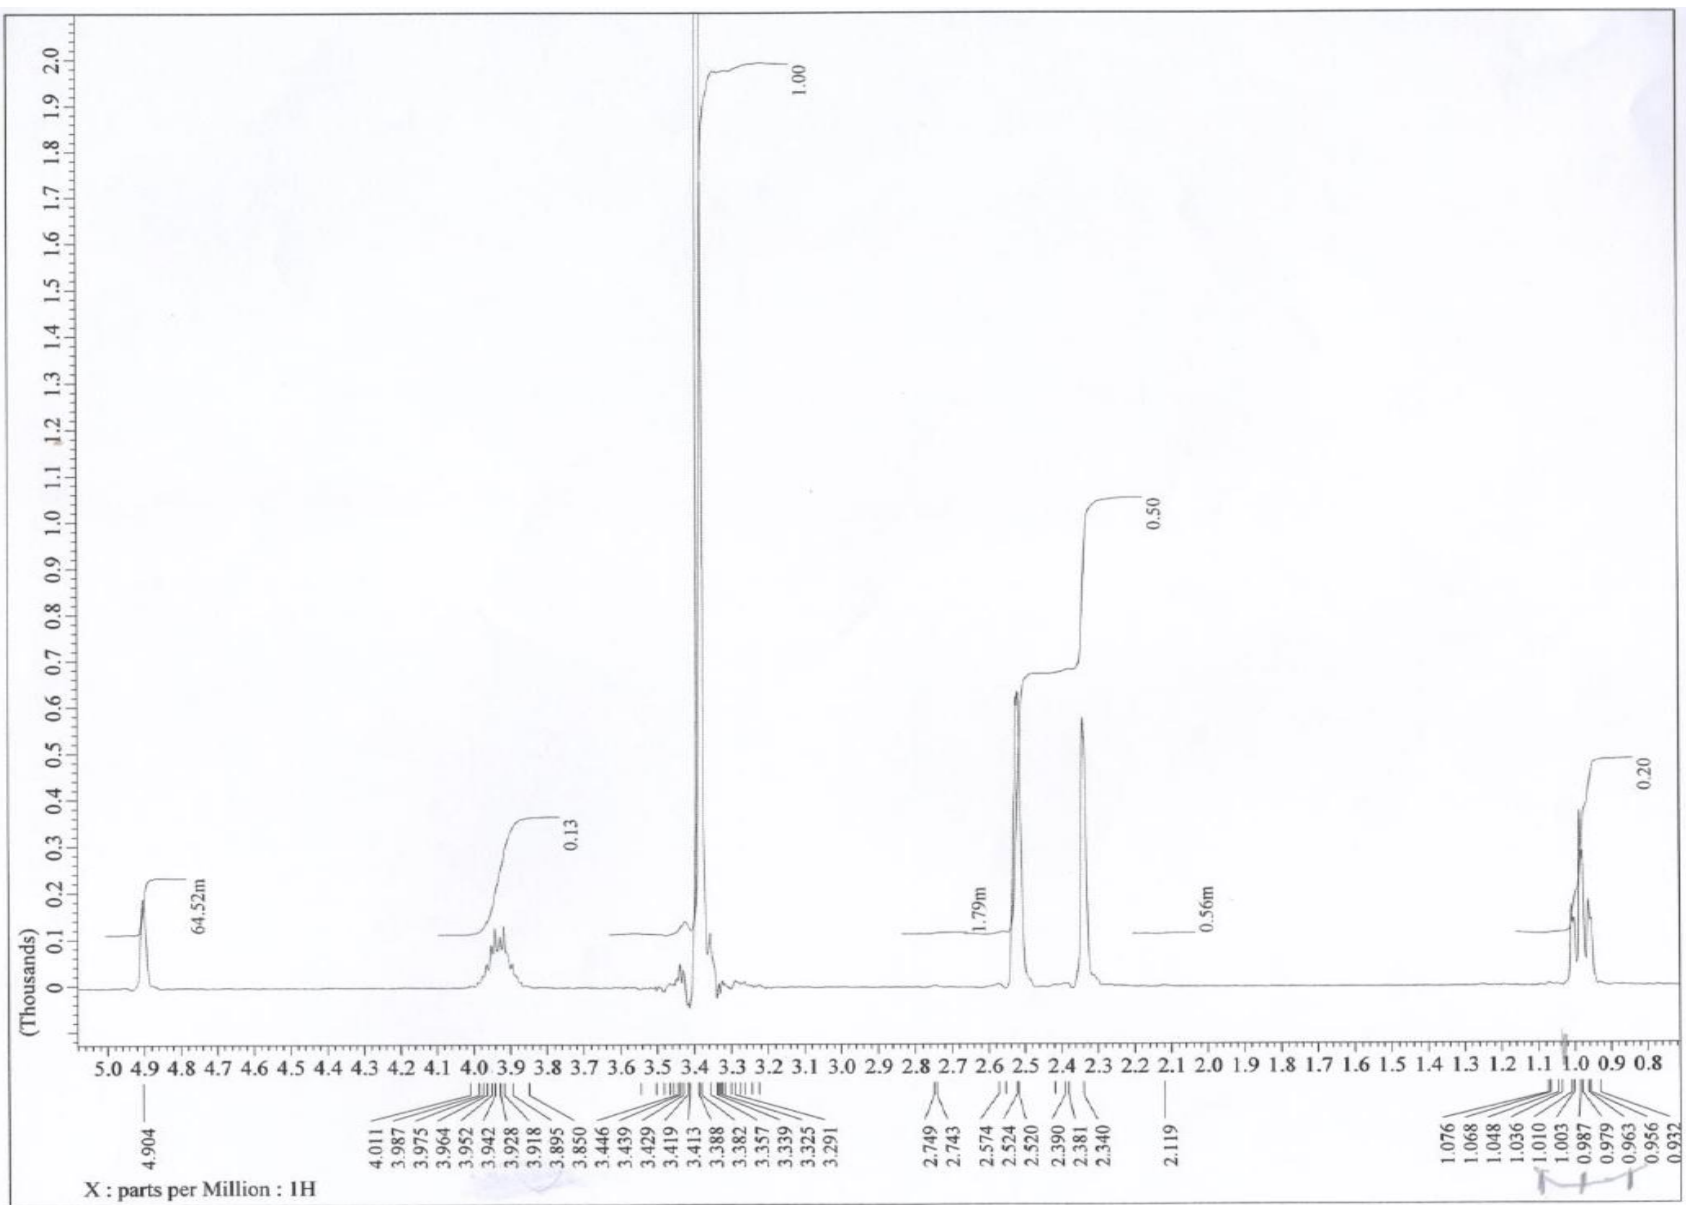



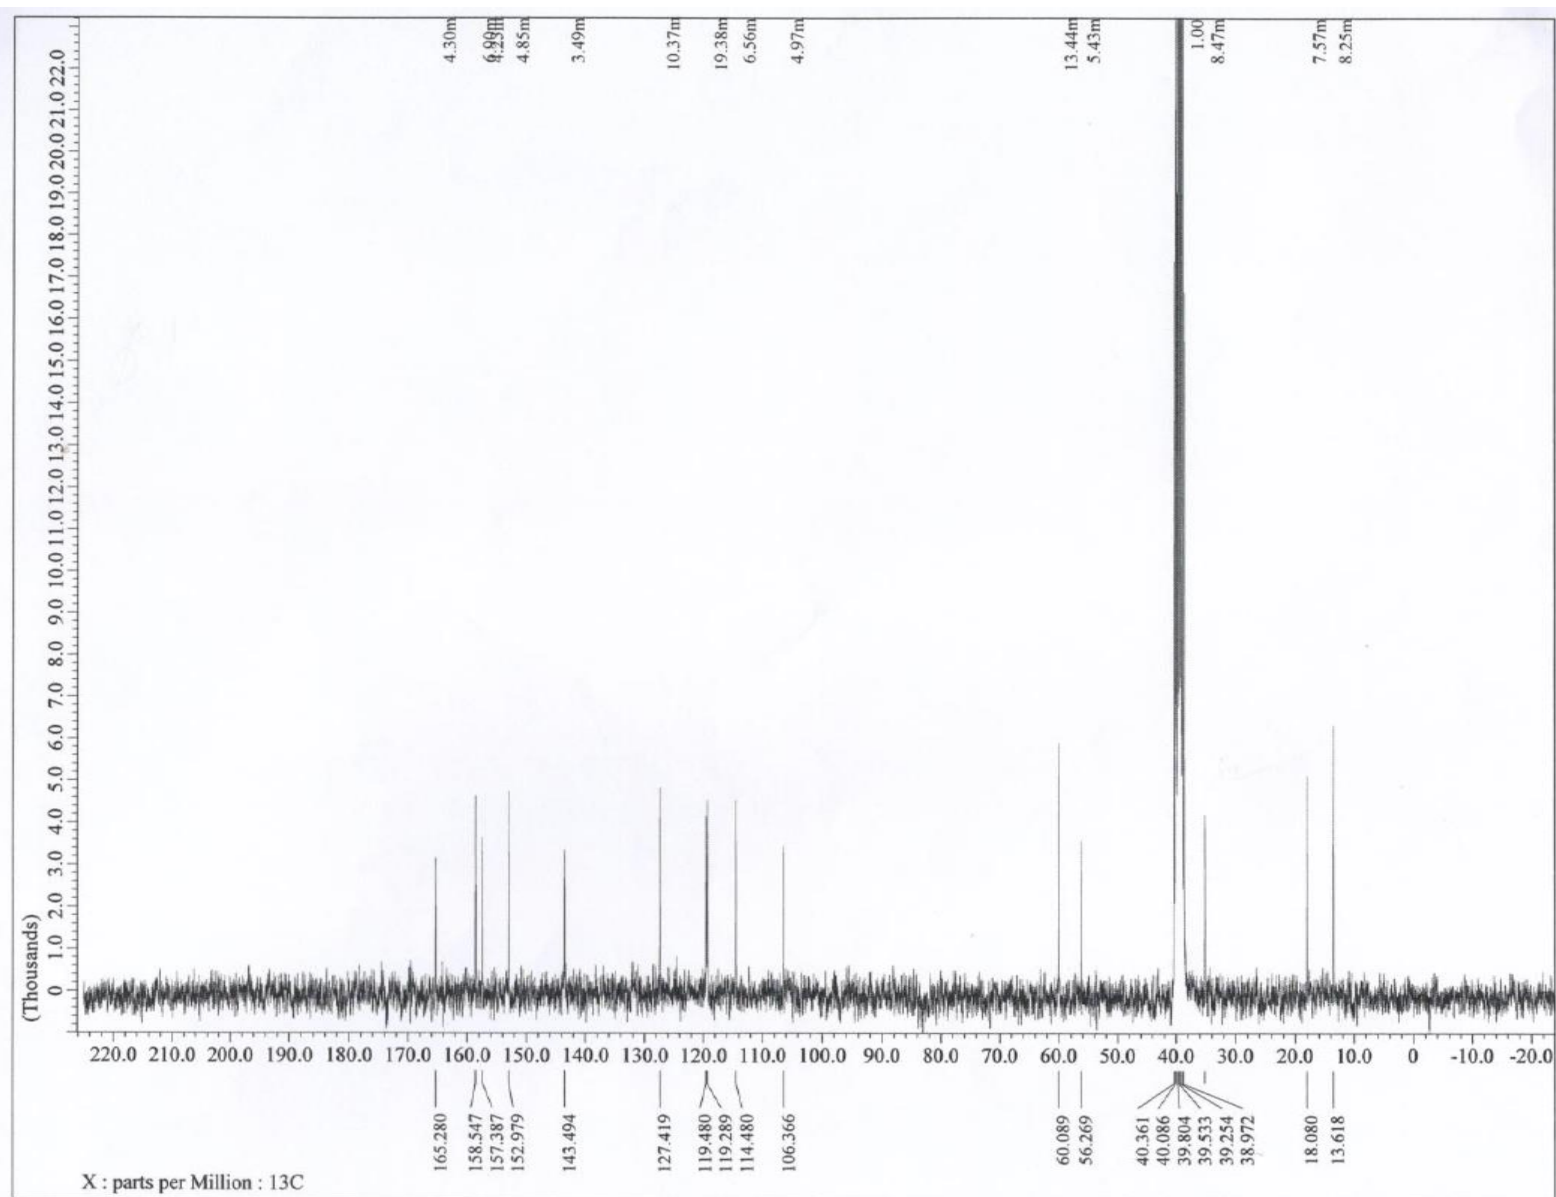

Line#:1 R.Time:2.3(Scan#:272)  
 MassPeaks:260  
 RawMode:Single 2.3(272) BasePeak:207(829071)  
 BG Mode:None Group 1 - Event 1

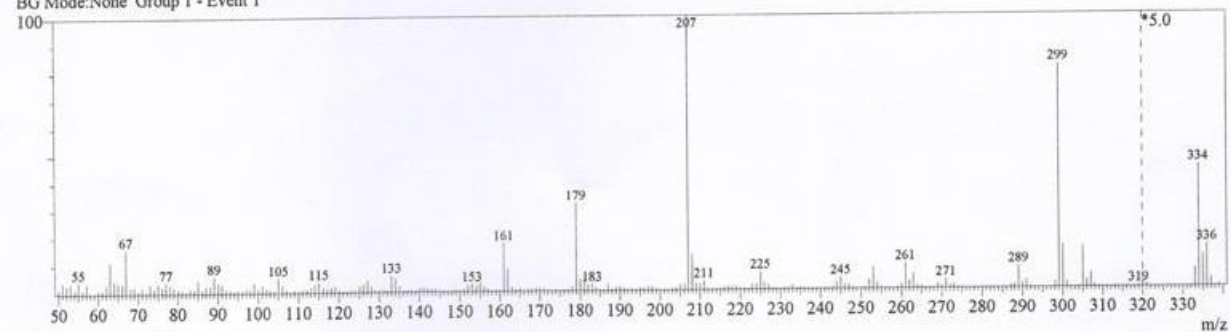

#### Mass Table

Line#:1 R.Time:2.3(Scan#:272)

MassPeaks:260

RawMode:Single 2.3(272) BasePeak:207(829071)

BG Mode:None Group 1 - Event 1

| # | m/z   | Abs. In | Rel. Int. | # | m/z   | Abs. In | Rel. Int. | # | m/z   | Abs. In | Rel. Int. |
|---|-------|---------|-----------|---|-------|---------|-----------|---|-------|---------|-----------|
| 1 | 50.00 | 12580   | 1.52      | 4 | 53.00 | 29759   | 3.59      | 7 | 56.05 | 9031    | 1.09      |
| 2 | 51.00 | 33724   | 4.07      | 5 | 54.05 | 10162   | 1.23      | 8 | 57.05 | 29743   | 3.59      |
| 3 | 52.00 | 23404   | 2.82      | 6 | 55.00 | 34367   | 4.15      | 9 | 58.00 | 3162    | 0.38      |

| #  | m/z    | Abs. In | Rel. Int. | #   | m/z    | Abs. In | Rel. Int. | #   | m/z    | Abs. In | Rel. Int. |
|----|--------|---------|-----------|-----|--------|---------|-----------|-----|--------|---------|-----------|
| 10 | 59.05  | 2863    | 0.35      | 79  | 128.05 | 19073   | 2.30      | 148 | 197.00 | 11108   | 1.34      |
| 11 | 60.00  | 8386    | 1.01      | 80  | 129.10 | 8734    | 1.05      | 149 | 198.00 | 10428   | 1.26      |
| 12 | 61.00  | 8942    | 1.08      | 81  | 130.10 | 5212    | 0.63      | 150 | 199.00 | 5889    | 0.71      |
| 13 | 62.05  | 27374   | 3.30      | 82  | 131.10 | 8001    | 0.97      | 151 | 200.00 | 2922    | 0.35      |
| 14 | 63.00  | 94250   | 11.37     | 83  | 132.15 | 5269    | 0.64      | 152 | 201.00 | 1548    | 0.19      |
| 15 | 64.00  | 38694   | 4.67      | 84  | 133.05 | 49712   | 6.00      | 153 | 201.95 | 1380    | 0.17      |
| 16 | 65.00  | 31215   | 3.77      | 85  | 134.05 | 40595   | 4.90      | 154 | 202.95 | 2363    | 0.29      |
| 17 | 66.05  | 28561   | 3.44      | 86  | 135.05 | 17741   | 2.14      | 155 | 203.95 | 5686    | 0.69      |
| 18 | 67.00  | 131818  | 15.90     | 87  | 136.05 | 3767    | 0.45      | 156 | 205.00 | 15412   | 1.86      |
| 19 | 68.00  | 17562   | 2.12      | 88  | 137.10 | 6034    | 0.73      | 157 | 206.05 | 18398   | 2.22      |
| 20 | 69.05  | 20440   | 2.47      | 89  | 138.05 | 5305    | 0.64      | 158 | 207.00 | 829071  | 100.00    |
| 21 | 70.10  | 7735    | 0.93      | 90  | 139.10 | 5959    | 0.72      | 159 | 208.00 | 107722  | 12.99     |
| 22 | 71.05  | 17431   | 2.10      | 91  | 140.10 | 10678   | 1.29      | 160 | 209.00 | 20894   | 2.52      |
| 23 | 72.05  | 4835    | 0.58      | 92  | 141.05 | 12409   | 1.50      | 161 | 210.00 | 18066   | 2.18      |
| 24 | 73.00  | 27729   | 3.34      | 93  | 142.05 | 10379   | 1.25      | 162 | 211.00 | 26886   | 3.24      |
| 25 | 74.05  | 13503   | 1.63      | 94  | 143.05 | 9690    | 1.17      | 163 | 212.00 | 5946    | 0.72      |
| 26 | 75.00  | 30618   | 3.69      | 95  | 144.05 | 8765    | 1.06      | 164 | 213.05 | 2958    | 0.36      |
| 27 | 76.00  | 18294   | 2.21      | 96  | 145.00 | 4306    | 0.52      | 165 | 214.00 | 2623    | 0.32      |
| 28 | 77.05  | 32208   | 3.88      | 97  | 146.05 | 1908    | 0.23      | 166 | 215.00 | 2566    | 0.31      |
| 29 | 78.05  | 24872   | 3.00      | 98  | 147.05 | 2583    | 0.31      | 167 | 216.00 | 9060    | 1.09      |
| 30 | 79.05  | 16936   | 2.04      | 99  | 148.05 | 1754    | 0.21      | 168 | 216.95 | 9676    | 1.17      |
| 31 | 80.05  | 11704   | 1.41      | 100 | 149.05 | 6442    | 0.78      | 169 | 217.95 | 11269   | 1.36      |
| 32 | 81.05  | 9232    | 1.11      | 101 | 150.05 | 4402    | 0.53      | 170 | 218.95 | 10955   | 1.32      |
| 33 | 82.05  | 5326    | 0.64      | 102 | 151.05 | 6386    | 0.77      | 171 | 219.95 | 5979    | 0.72      |
| 34 | 83.05  | 12337   | 1.49      | 103 | 152.05 | 18824   | 2.27      | 172 | 220.95 | 4932    | 0.59      |
| 35 | 84.05  | 11628   | 1.40      | 104 | 153.00 | 21012   | 2.53      | 173 | 222.05 | 2509    | 0.30      |
| 36 | 85.05  | 40152   | 4.84      | 105 | 154.05 | 17632   | 2.13      | 174 | 222.95 | 14558   | 1.76      |
| 37 | 86.05  | 8478    | 1.02      | 106 | 155.00 | 24708   | 2.98      | 175 | 224.00 | 15655   | 1.89      |
| 38 | 87.00  | 19516   | 2.35      | 107 | 156.05 | 13714   | 1.65      | 176 | 225.00 | 52988   | 6.39      |
| 39 | 88.05  | 21425   | 2.58      | 108 | 157.00 | 7137    | 0.86      | 177 | 226.00 | 20084   | 2.42      |
| 40 | 89.05  | 50056   | 6.04      | 109 | 158.00 | 2940    | 0.35      | 178 | 227.00 | 12911   | 1.56      |
| 41 | 90.05  | 31307   | 3.78      | 110 | 159.05 | 4587    | 0.55      | 179 | 228.00 | 5697    | 0.69      |
| 42 | 91.00  | 25719   | 3.10      | 111 | 160.05 | 5888    | 0.71      | 180 | 229.05 | 3765    | 0.45      |
| 43 | 92.00  | 10838   | 1.31      | 112 | 161.00 | 143836  | 17.35     | 181 | 230.00 | 2223    | 0.27      |
| 44 | 93.05  | 10631   | 1.28      | 113 | 162.00 | 66228   | 7.99      | 182 | 231.00 | 4532    | 0.55      |
| 45 | 94.05  | 6146    | 0.74      | 114 | 163.00 | 13100   | 1.58      | 183 | 232.00 | 5716    | 0.69      |
| 46 | 95.05  | 8862    | 1.07      | 115 | 164.00 | 5783    | 0.70      | 184 | 233.00 | 12332   | 1.49      |
| 47 | 96.10  | 5182    | 0.63      | 116 | 165.00 | 7846    | 0.95      | 185 | 234.00 | 5188    | 0.63      |
| 48 | 97.05  | 13338   | 1.61      | 117 | 166.00 | 3385    | 0.41      | 186 | 235.00 | 6452    | 0.78      |
| 49 | 98.05  | 11249   | 1.36      | 118 | 167.00 | 4910    | 0.59      | 187 | 236.00 | 4726    | 0.57      |
| 50 | 99.00  | 30553   | 3.69      | 119 | 168.00 | 4959    | 0.60      | 188 | 237.00 | 4006    | 0.48      |
| 51 | 100.00 | 13305   | 1.60      | 120 | 169.00 | 9634    | 1.16      | 189 | 238.00 | 3158    | 0.38      |
| 52 | 101.05 | 22182   | 2.68      | 121 | 170.00 | 8362    | 1.01      | 190 | 239.10 | 3007    | 0.36      |
| 53 | 102.05 | 13774   | 1.66      | 122 | 171.00 | 7404    | 0.89      | 191 | 240.05 | 1077    | 0.13      |
| 54 | 103.05 | 8349    | 1.01      | 123 | 172.00 | 2743    | 0.33      | 192 | 241.05 | 3251    | 0.39      |
| 55 | 104.15 | 6637    | 0.80      | 124 | 173.00 | 1574    | 0.19      | 193 | 242.00 | 2473    | 0.30      |
| 56 | 105.05 | 44148   | 5.32      | 125 | 174.00 | 1649    | 0.20      | 194 | 243.05 | 4589    | 0.55      |
| 57 | 106.05 | 22447   | 2.71      | 126 | 175.00 | 1281    | 0.15      | 195 | 244.00 | 19236   | 2.32      |
| 58 | 107.10 | 8095    | 0.98      | 127 | 175.95 | 2446    | 0.30      | 196 | 244.95 | 33614   | 4.05      |
| 59 | 108.10 | 3945    | 0.48      | 128 | 177.00 | 5031    | 0.61      | 197 | 245.95 | 13294   | 1.60      |
| 60 | 109.05 | 6182    | 0.75      | 129 | 178.05 | 12054   | 1.45      | 198 | 246.95 | 13617   | 1.64      |
| 61 | 110.10 | 3652    | 0.44      | 130 | 179.00 | 264796  | 31.94     | 199 | 247.95 | 3886    | 0.47      |
| 62 | 111.10 | 8871    | 1.07      | 131 | 180.00 | 35361   | 4.27      | 200 | 249.00 | 1802    | 0.22      |
| 63 | 112.10 | 8394    | 1.01      | 132 | 180.95 | 27130   | 3.27      | 201 | 250.05 | 1224    | 0.15      |
| 64 | 113.10 | 14161   | 1.71      | 133 | 182.00 | 17897   | 2.16      | 202 | 251.05 | 3528    | 0.43      |
| 65 | 114.05 | 24038   | 2.90      | 134 | 183.00 | 18804   | 2.27      | 203 | 252.05 | 26603   | 3.21      |
| 66 | 115.05 | 31440   | 3.79      | 135 | 184.00 | 9423    | 1.14      | 204 | 253.05 | 64215   | 7.75      |
| 67 | 116.10 | 13782   | 1.66      | 136 | 185.05 | 4240    | 0.51      | 205 | 254.00 | 17753   | 2.14      |
| 68 | 117.05 | 10933   | 1.32      | 137 | 186.05 | 2261    | 0.27      | 206 | 255.05 | 6527    | 0.79      |
| 69 | 118.05 | 13935   | 1.68      | 138 | 187.00 | 18617   | 2.25      | 207 | 256.10 | 2382    | 0.29      |
| 70 | 119.05 | 18896   | 2.28      | 139 | 188.00 | 4212    | 0.51      | 208 | 257.15 | 1635    | 0.20      |
| 71 | 120.05 | 6139    | 0.74      | 140 | 189.00 | 7991    | 0.96      | 209 | 259.05 | 4490    | 0.54      |
| 72 | 121.05 | 3567    | 0.43      | 141 | 189.95 | 11751   | 1.42      | 210 | 260.05 | 12926   | 1.56      |
| 73 | 122.05 | 3226    | 0.39      | 142 | 190.95 | 7259    | 0.88      | 211 | 261.00 | 75047   | 9.05      |
| 74 | 123.05 | 8580    | 1.03      | 143 | 191.95 | 4851    | 0.59      | 212 | 262.00 | 21842   | 2.63      |
| 75 | 124.10 | 6342    | 0.76      | 144 | 192.95 | 5132    | 0.62      | 213 | 263.00 | 42406   | 5.11      |
| 76 | 125.05 | 16775   | 2.02      | 145 | 194.00 | 2793    | 0.34      | 214 | 264.00 | 8638    | 1.04      |
| 77 | 126.05 | 23831   | 2.87      | 146 | 195.00 | 7830    | 0.94      | 215 | 265.00 | 8282    | 1.00      |
| 78 | 127.05 | 36347   | 4.38      | 147 | 196.00 | 5244    | 0.63      | 216 | 266.05 | 1521    | 0.18      |

| #   | m/z    | Abs. In | Rel. Int. | #   | m/z    | Abs. In | Rel. Int. | #   | m/z    | Abs. In | Rel. Int. |
|-----|--------|---------|-----------|-----|--------|---------|-----------|-----|--------|---------|-----------|
| 217 | 267.10 | 1950    | 0.24      | 232 | 288.05 | 9723    | 1.17      | 247 | 306.00 | 21266   | 2.57      |
| 218 | 268.05 | 1082    | 0.13      | 233 | 289.00 | 65234   | 7.87      | 248 | 307.00 | 42828   | 5.17      |
| 219 | 269.05 | 12588   | 1.52      | 234 | 290.00 | 13959   | 1.68      | 249 | 307.95 | 7615    | 0.92      |
| 220 | 270.00 | 6604    | 0.80      | 235 | 291.00 | 22985   | 2.77      | 250 | 309.00 | 1396    | 0.17      |
| 221 | 271.05 | 25605   | 3.09      | 236 | 292.00 | 4551    | 0.55      | 251 | 313.15 | 1467    | 0.18      |
| 222 | 272.05 | 7911    | 0.95      | 237 | 293.00 | 1378    | 0.17      | 252 | 319.00 | 3914    | 0.47      |
| 223 | 273.00 | 12353   | 1.49      | 238 | 295.00 | 1078    | 0.13      | 253 | 320.00 | 1220    | 0.15      |
| 224 | 274.00 | 2879    | 0.35      | 239 | 297.10 | 2825    | 0.34      | 254 | 321.00 | 1476    | 0.18      |
| 225 | 275.00 | 3996    | 0.48      | 240 | 298.15 | 18117   | 2.19      | 255 | 333.05 | 10997   | 1.33      |
| 226 | 276.00 | 1252    | 0.15      | 241 | 299.10 | 676655  | 81.62     | 256 | 334.00 | 74137   | 8.94      |
| 227 | 280.00 | 1262    | 0.15      | 242 | 300.05 | 127443  | 15.37     | 257 | 335.00 | 19362   | 2.34      |
| 228 | 281.05 | 1120    | 0.14      | 243 | 301.05 | 17116   | 2.06      | 258 | 336.00 | 25348   | 3.06      |
| 229 | 282.05 | 1216    | 0.15      | 244 | 302.05 | 2077    | 0.25      | 259 | 337.00 | 5242    | 0.63      |
| 230 | 285.10 | 1295    | 0.16      | 245 | 304.05 | 1926    | 0.23      | 260 | 338.95 | 1472    | 0.18      |
| 231 | 287.00 | 8543    | 1.03      | 246 | 305.00 | 123962  | 14.95     |     |        |         |           |

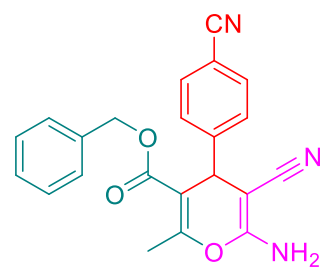

**Compound 4k**

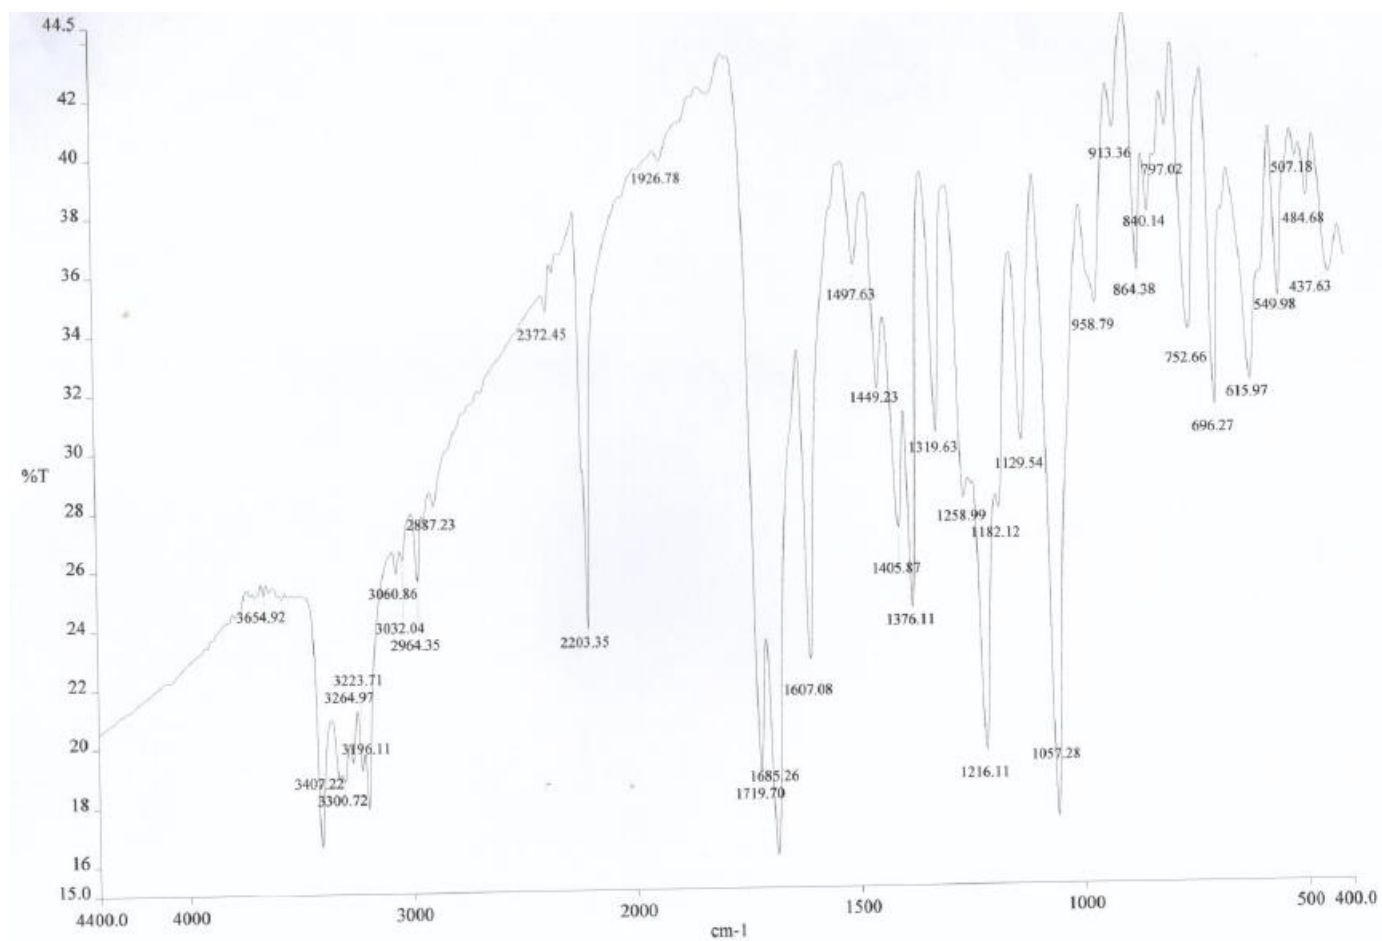

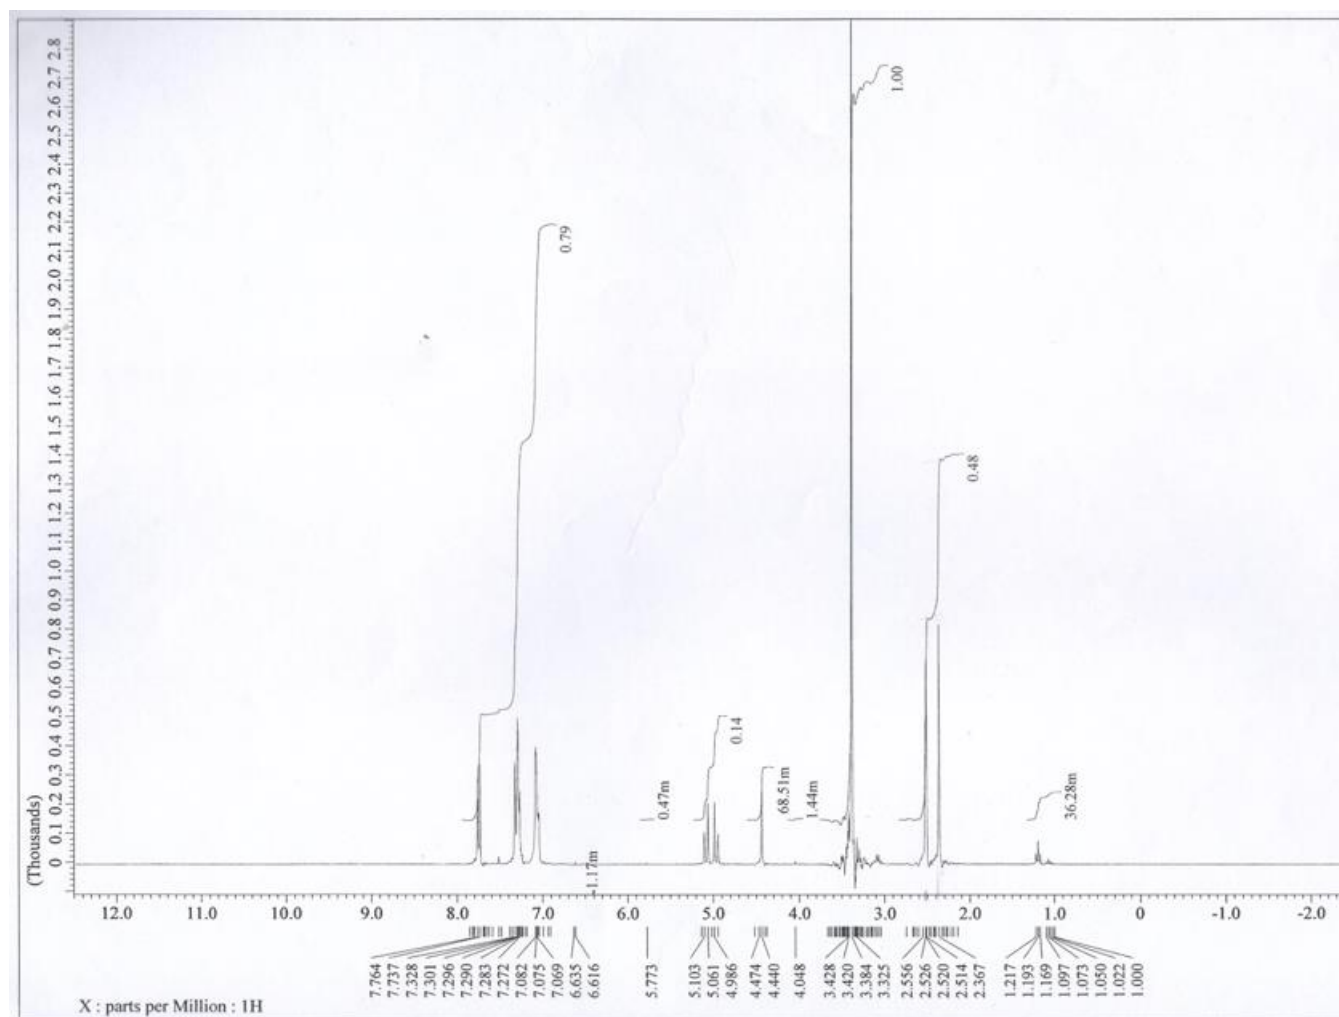



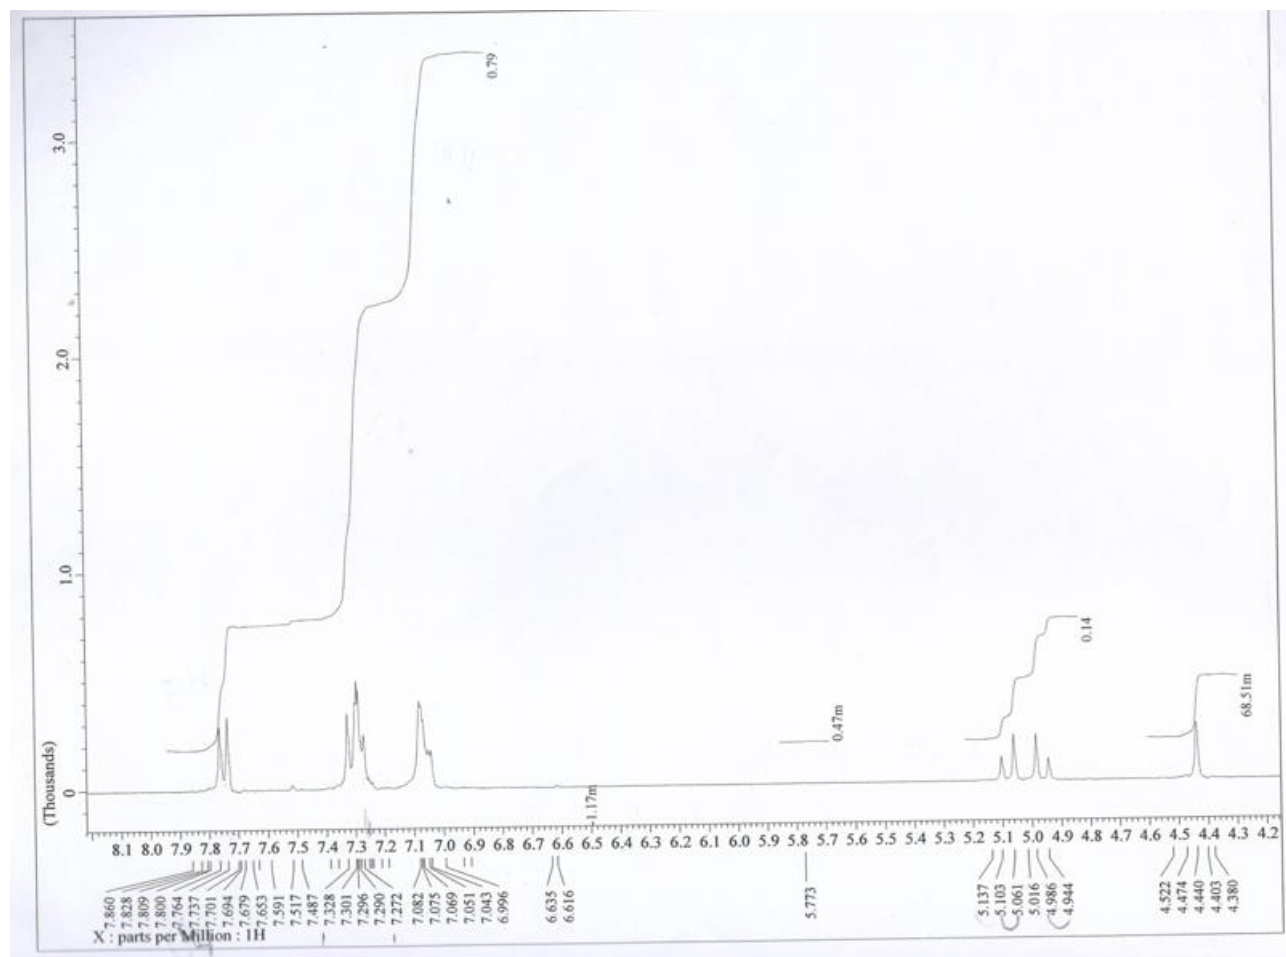

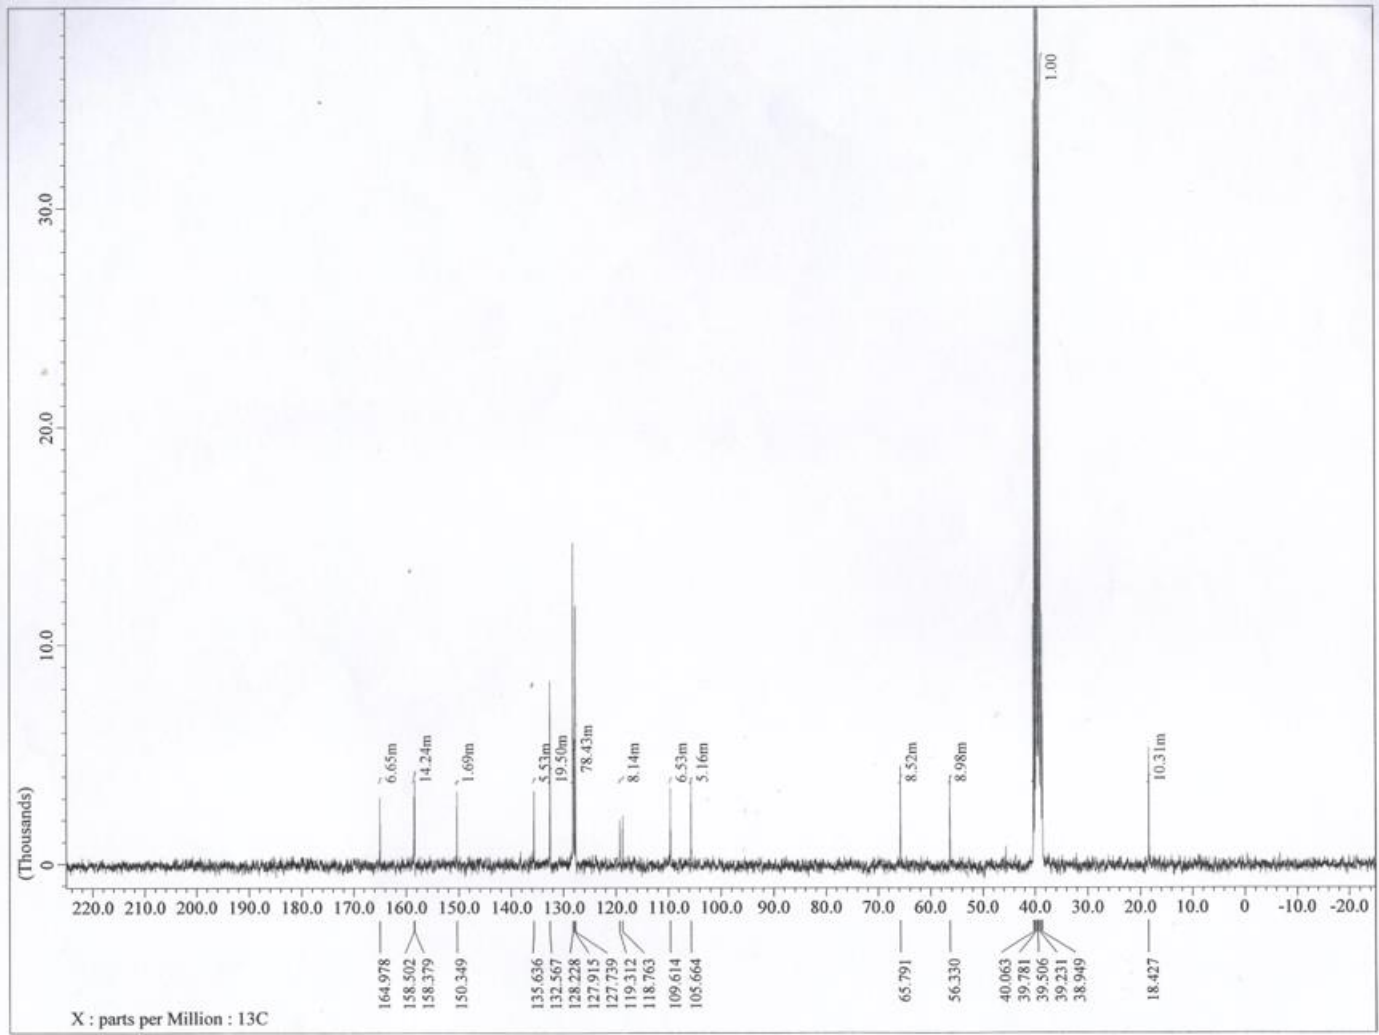

Line#:1 R.Time:3.1(Scan#:371)

MassPeaks:228

RawMode:Single 3.1(371) BasePeak:91(2478377)

BG Mode:None Group 1 - Event 1

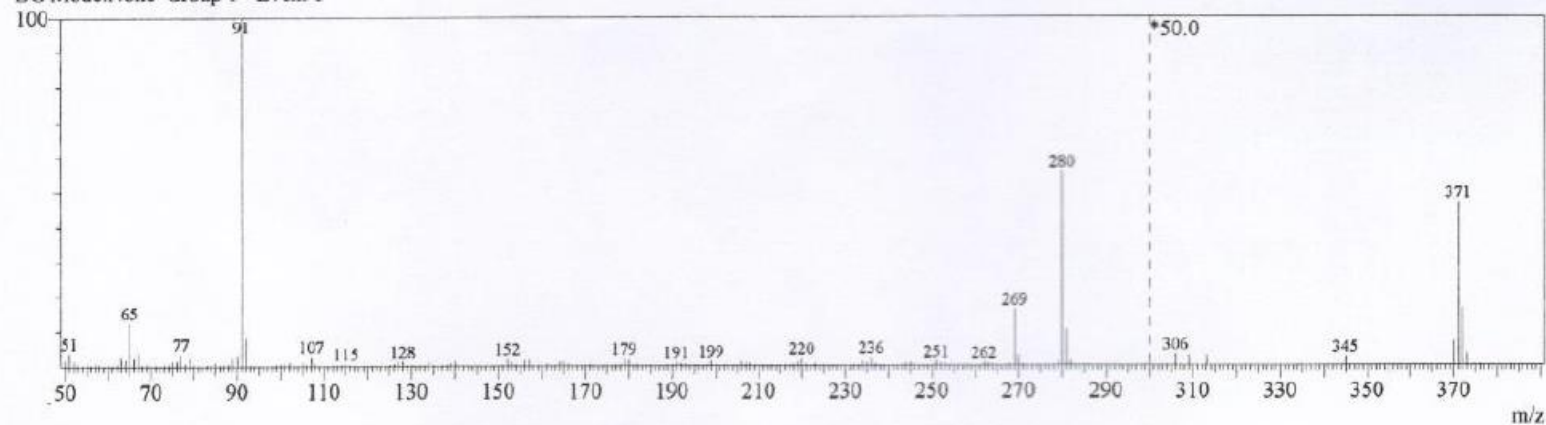

#### Mass Table

Line#:1 R.Time:3.1(Scan#:371)

MassPeaks:228

RawMode:Single 3.1(371) BasePeak:91(2478377)

BG Mode:None Group 1 - Event 1

| # | m/z   | Abs. In | Rel. Int. | # | m/z   | Abs. In | Rel. Int. | # | m/z   | Abs. In | Rel. Int. |
|---|-------|---------|-----------|---|-------|---------|-----------|---|-------|---------|-----------|
| 1 | 50.00 | 38130   | 1.54      | 4 | 53.00 | 16158   | 0.65      | 7 | 56.05 | 7191    | 0.29      |
| 2 | 51.00 | 90305   | 3.64      | 5 | 54.05 | 7095    | 0.29      | 8 | 57.05 | 22025   | 0.89      |
| 3 | 52.00 | 35161   | 1.42      | 6 | 55.00 | 24422   | 0.99      | 9 | 58.00 | 13943   | 0.56      |

| #  | m/z    | Abs. In | Rel. Int. | #   | m/z    | Abs. In | Rel. Int. | #   | m/z    | Abs. In | Rel. Int. |
|----|--------|---------|-----------|-----|--------|---------|-----------|-----|--------|---------|-----------|
| 10 | 59.05  | 4233    | 0.17      | 79  | 128.05 | 29855   | 1.20      | 148 | 201.95 | 1549    | 0.06      |
| 11 | 60.00  | 9758    | 0.39      | 80  | 129.05 | 10865   | 0.44      | 149 | 203.00 | 1817    | 0.07      |
| 12 | 61.00  | 7762    | 0.31      | 81  | 130.05 | 5436    | 0.22      | 150 | 203.95 | 1597    | 0.06      |
| 13 | 62.05  | 17523   | 0.71      | 82  | 131.10 | 3289    | 0.13      | 151 | 205.05 | 2664    | 0.11      |
| 14 | 63.00  | 62614   | 2.53      | 83  | 132.10 | 2337    | 0.09      | 152 | 205.95 | 27356   | 1.10      |
| 15 | 64.05  | 40950   | 1.65      | 84  | 133.15 | 5656    | 0.23      | 153 | 206.95 | 19789   | 0.80      |
| 16 | 65.00  | 305596  | 12.33     | 85  | 134.05 | 24770   | 1.00      | 154 | 208.00 | 15678   | 0.63      |
| 17 | 66.00  | 56799   | 2.29      | 86  | 135.05 | 5552    | 0.22      | 155 | 209.00 | 4775    | 0.19      |
| 18 | 67.00  | 95281   | 3.84      | 87  | 136.05 | 1429    | 0.06      | 156 | 209.95 | 2530    | 0.10      |
| 19 | 68.00  | 11681   | 0.47      | 88  | 137.05 | 4179    | 0.17      | 157 | 211.00 | 1478    | 0.06      |
| 20 | 69.05  | 14357   | 0.58      | 89  | 138.05 | 10194   | 0.41      | 158 | 213.05 | 1632    | 0.07      |
| 21 | 70.05  | 4874    | 0.20      | 90  | 139.05 | 12782   | 0.52      | 159 | 214.05 | 1195    | 0.05      |
| 22 | 71.05  | 11128   | 0.45      | 91  | 140.05 | 27854   | 1.12      | 160 | 215.05 | 1061    | 0.04      |
| 23 | 72.05  | 1399    | 0.06      | 92  | 141.05 | 7218    | 0.29      | 161 | 216.00 | 5073    | 0.20      |
| 24 | 73.00  | 10897   | 0.44      | 93  | 142.05 | 3749    | 0.15      | 162 | 217.00 | 5772    | 0.23      |
| 25 | 74.00  | 14236   | 0.57      | 94  | 143.05 | 2910    | 0.12      | 163 | 217.95 | 4473    | 0.18      |
| 26 | 75.00  | 34425   | 1.39      | 95  | 144.05 | 1102    | 0.04      | 164 | 218.95 | 23479   | 0.95      |
| 27 | 76.00  | 32572   | 1.31      | 96  | 145.05 | 1339    | 0.05      | 165 | 219.95 | 51019   | 2.06      |
| 28 | 77.00  | 82271   | 3.32      | 97  | 146.05 | 1086    | 0.04      | 166 | 220.95 | 10480   | 0.42      |
| 29 | 78.05  | 20835   | 0.84      | 98  | 147.10 | 1241    | 0.05      | 167 | 221.95 | 3876    | 0.16      |
| 30 | 79.05  | 60329   | 2.43      | 99  | 149.05 | 3989    | 0.16      | 168 | 223.00 | 12751   | 0.51      |
| 31 | 80.05  | 7529    | 0.30      | 100 | 150.00 | 3198    | 0.13      | 169 | 224.00 | 3842    | 0.16      |
| 32 | 81.05  | 5811    | 0.23      | 101 | 151.05 | 6733    | 0.27      | 170 | 225.00 | 2286    | 0.09      |
| 33 | 82.10  | 3534    | 0.14      | 102 | 152.00 | 46681   | 1.88      | 171 | 226.00 | 1322    | 0.05      |
| 34 | 83.05  | 9279    | 0.37      | 103 | 153.00 | 25350   | 1.02      | 172 | 227.05 | 1761    | 0.07      |
| 35 | 84.05  | 7153    | 0.29      | 104 | 154.00 | 12154   | 0.49      | 173 | 228.05 | 1101    | 0.04      |
| 36 | 85.05  | 21024   | 0.85      | 105 | 155.05 | 6175    | 0.25      | 174 | 229.95 | 1398    | 0.06      |
| 37 | 86.00  | 5239    | 0.21      | 106 | 156.00 | 35439   | 1.43      | 175 | 233.05 | 2348    | 0.09      |
| 38 | 87.00  | 10204   | 0.41      | 107 | 157.00 | 42956   | 1.73      | 176 | 233.95 | 29689   | 1.20      |
| 39 | 88.05  | 13110   | 0.53      | 108 | 158.00 | 5332    | 0.22      | 177 | 235.00 | 18716   | 0.76      |
| 40 | 89.00  | 56270   | 2.27      | 109 | 159.00 | 1391    | 0.06      | 178 | 236.00 | 56961   | 2.30      |
| 41 | 90.05  | 78869   | 3.18      | 110 | 160.05 | 1647    | 0.07      | 179 | 237.00 | 12006   | 0.48      |
| 42 | 91.05  | 247837  | 100.00    | 111 | 161.00 | 13318   | 0.54      | 180 | 238.00 | 3306    | 0.13      |
| 43 | 92.05  | 196570  | 7.93      | 112 | 161.95 | 3669    | 0.15      | 181 | 239.10 | 2175    | 0.09      |
| 44 | 93.05  | 9655    | 0.39      | 113 | 163.05 | 5730    | 0.23      | 182 | 240.00 | 1322    | 0.05      |
| 45 | 94.05  | 2433    | 0.10      | 114 | 164.00 | 29070   | 1.17      | 183 | 241.05 | 1253    | 0.05      |
| 46 | 95.05  | 5393    | 0.22      | 115 | 165.00 | 26647   | 1.08      | 184 | 242.05 | 1037    | 0.04      |
| 47 | 96.10  | 3441    | 0.14      | 116 | 166.00 | 16962   | 0.68      | 185 | 243.95 | 16032   | 0.65      |
| 48 | 97.05  | 9011    | 0.36      | 117 | 167.00 | 6946    | 0.28      | 186 | 244.95 | 20742   | 0.84      |
| 49 | 98.05  | 6367    | 0.26      | 118 | 168.00 | 5490    | 0.22      | 187 | 245.95 | 4612    | 0.19      |
| 50 | 99.05  | 11988   | 0.48      | 119 | 169.00 | 3638    | 0.15      | 188 | 247.00 | 1407    | 0.06      |
| 51 | 100.00 | 14945   | 0.60      | 120 | 170.00 | 6746    | 0.27      | 189 | 248.00 | 1623    | 0.07      |
| 52 | 101.05 | 22215   | 0.90      | 121 | 171.00 | 10634   | 0.43      | 190 | 250.05 | 1394    | 0.06      |
| 53 | 102.00 | 25727   | 1.04      | 122 | 172.00 | 8382    | 0.34      | 191 | 251.00 | 28382   | 1.15      |
| 54 | 103.00 | 9177    | 0.37      | 123 | 173.00 | 1846    | 0.07      | 192 | 252.00 | 15634   | 0.63      |
| 55 | 104.05 | 4460    | 0.18      | 124 | 173.95 | 2095    | 0.08      | 193 | 253.00 | 13044   | 0.53      |
| 56 | 105.05 | 21782   | 0.88      | 125 | 176.00 | 1689    | 0.07      | 194 | 254.00 | 3794    | 0.15      |
| 57 | 106.05 | 11044   | 0.45      | 126 | 177.00 | 4382    | 0.18      | 195 | 255.05 | 1909    | 0.08      |
| 58 | 107.05 | 67138   | 2.71      | 127 | 178.00 | 10804   | 0.44      | 196 | 256.05 | 1701    | 0.07      |
| 59 | 108.05 | 18537   | 0.75      | 128 | 178.95 | 49979   | 2.02      | 197 | 257.05 | 1575    | 0.06      |
| 60 | 109.10 | 4534    | 0.18      | 129 | 180.00 | 40721   | 1.64      | 198 | 258.00 | 2345    | 0.09      |
| 61 | 110.10 | 2249    | 0.09      | 130 | 181.00 | 11193   | 0.45      | 199 | 261.05 | 1215    | 0.05      |
| 62 | 111.05 | 5369    | 0.22      | 131 | 182.00 | 10972   | 0.44      | 200 | 262.00 | 20161   | 0.81      |
| 63 | 112.10 | 5215    | 0.21      | 132 | 183.00 | 2996    | 0.12      | 201 | 263.00 | 15046   | 0.61      |
| 64 | 113.05 | 9334    | 0.38      | 133 | 183.95 | 3077    | 0.12      | 202 | 264.00 | 9580    | 0.39      |
| 65 | 114.05 | 7866    | 0.32      | 134 | 185.00 | 2079    | 0.08      | 203 | 265.00 | 2270    | 0.09      |
| 66 | 115.05 | 14255   | 0.58      | 135 | 189.00 | 4969    | 0.20      | 204 | 266.00 | 1180    | 0.05      |
| 67 | 116.05 | 8264    | 0.33      | 136 | 190.00 | 5022    | 0.20      | 205 | 267.05 | 1366    | 0.06      |
| 68 | 117.10 | 4252    | 0.17      | 137 | 190.95 | 25489   | 1.03      | 206 | 268.05 | 6182    | 0.25      |
| 69 | 118.05 | 3426    | 0.14      | 138 | 191.95 | 16486   | 0.67      | 207 | 269.05 | 396493  | 16.00     |
| 70 | 119.05 | 3367    | 0.14      | 139 | 193.00 | 14302   | 0.58      | 208 | 270.00 | 70511   | 2.85      |
| 71 | 120.05 | 1690    | 0.07      | 140 | 193.95 | 6698    | 0.27      | 209 | 271.00 | 9028    | 0.36      |
| 72 | 121.05 | 2251    | 0.09      | 141 | 195.00 | 5281    | 0.21      | 210 | 272.00 | 1658    | 0.07      |
| 73 | 122.05 | 2445    | 0.10      | 142 | 195.95 | 2918    | 0.12      | 211 | 278.05 | 2796    | 0.11      |
| 74 | 123.05 | 2798    | 0.11      | 143 | 197.05 | 1444    | 0.06      | 212 | 279.05 | 23573   | 0.95      |
| 75 | 124.05 | 4566    | 0.18      | 144 | 198.05 | 5118    | 0.21      | 213 | 280.00 | 137926  | 55.65     |
| 76 | 125.05 | 9431    | 0.38      | 145 | 198.95 | 31053   | 1.25      | 214 | 281.00 | 255044  | 10.29     |
| 77 | 126.05 | 13440   | 0.54      | 146 | 199.95 | 4537    | 0.18      | 215 | 281.95 | 32319   | 1.30      |
| 78 | 127.05 | 26923   | 1.09      | 147 | 201.00 | 1226    | 0.05      | 216 | 283.00 | 3695    | 0.15      |

| #   | m/z    | Abs. In | Rel. Int. | #   | m/z    | Abs. In | Rel. Int. | #   | m/z    | Abs. In | Rel. Int. |
|-----|--------|---------|-----------|-----|--------|---------|-----------|-----|--------|---------|-----------|
| 217 | 284.05 | 1154    | 0.05      | 221 | 306.00 | 1534    | 0.06      | 225 | 370.05 | 3319    | 0.13      |
| 218 | 285.05 | 2987    | 0.12      | 222 | 309.00 | 1404    | 0.06      | 226 | 371.00 | 23178   | 0.94      |
| 219 | 286.05 | 1456    | 0.06      | 223 | 313.15 | 1359    | 0.05      | 227 | 372.00 | 8198    | 0.33      |
| 220 | 287.00 | 1079    | 0.04      | 224 | 345.00 | 1164    | 0.05      | 228 | 373.05 | 1594    | 0.06      |

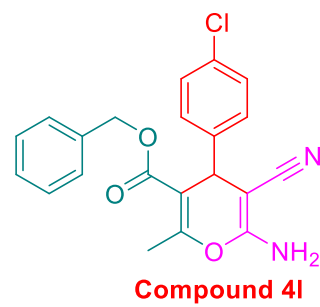

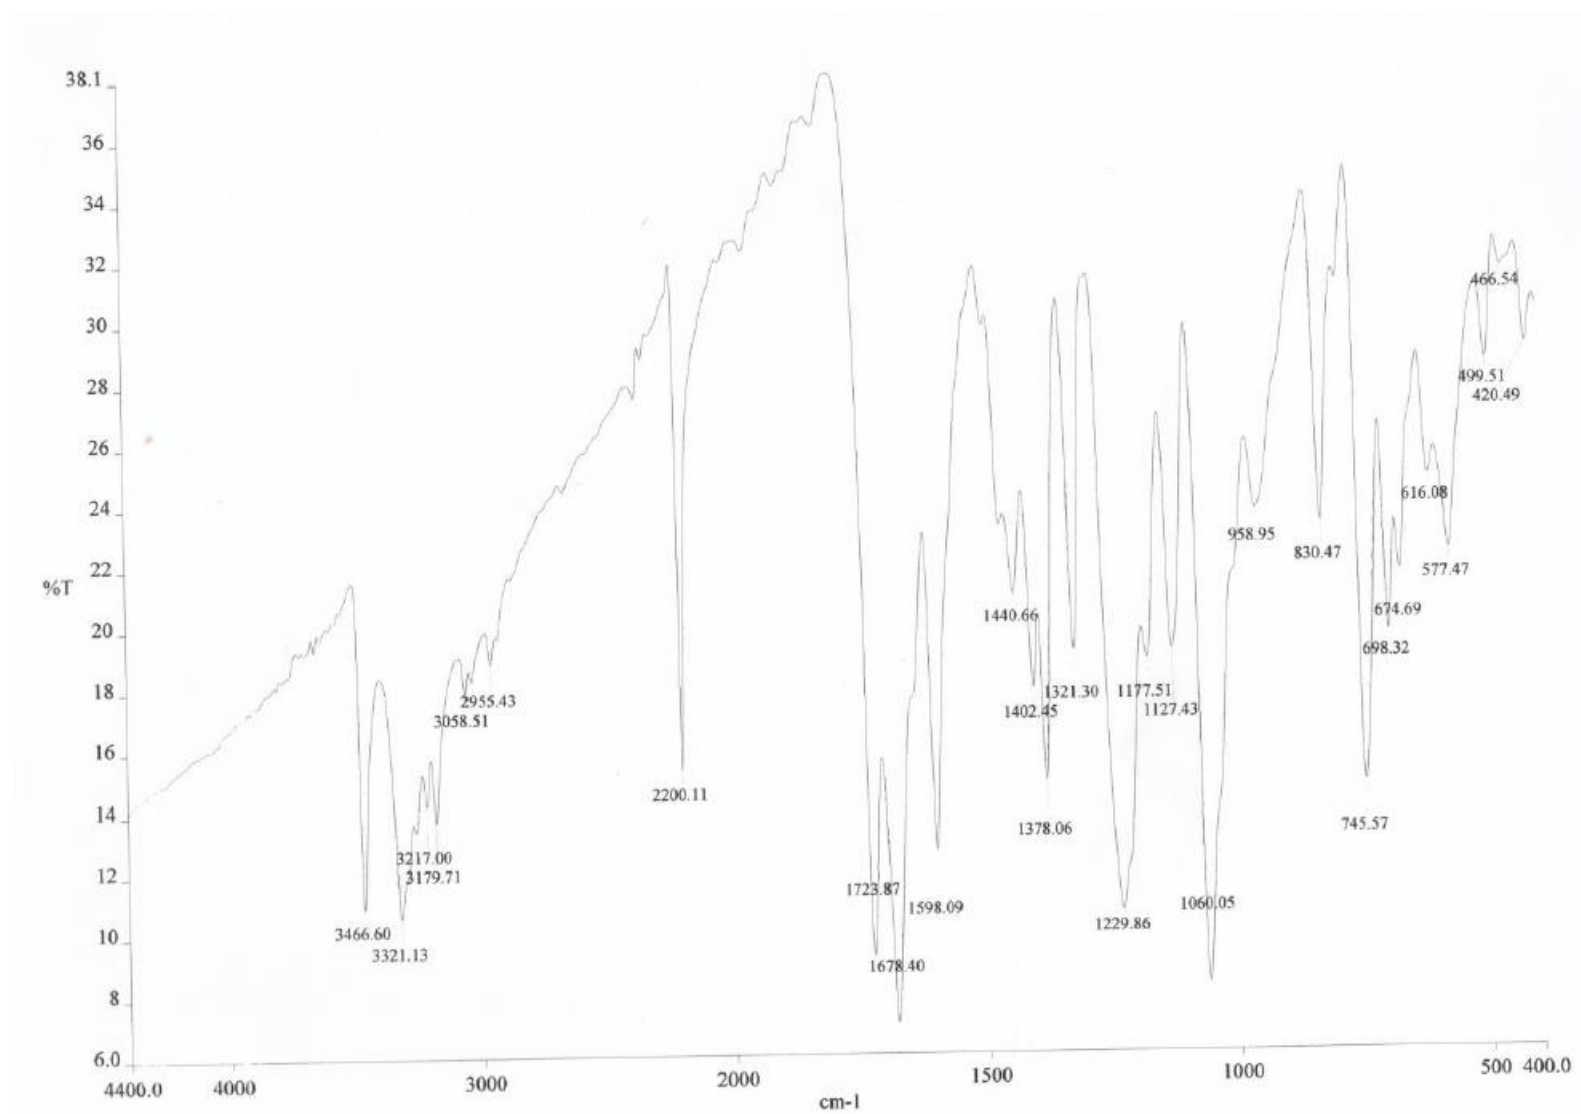



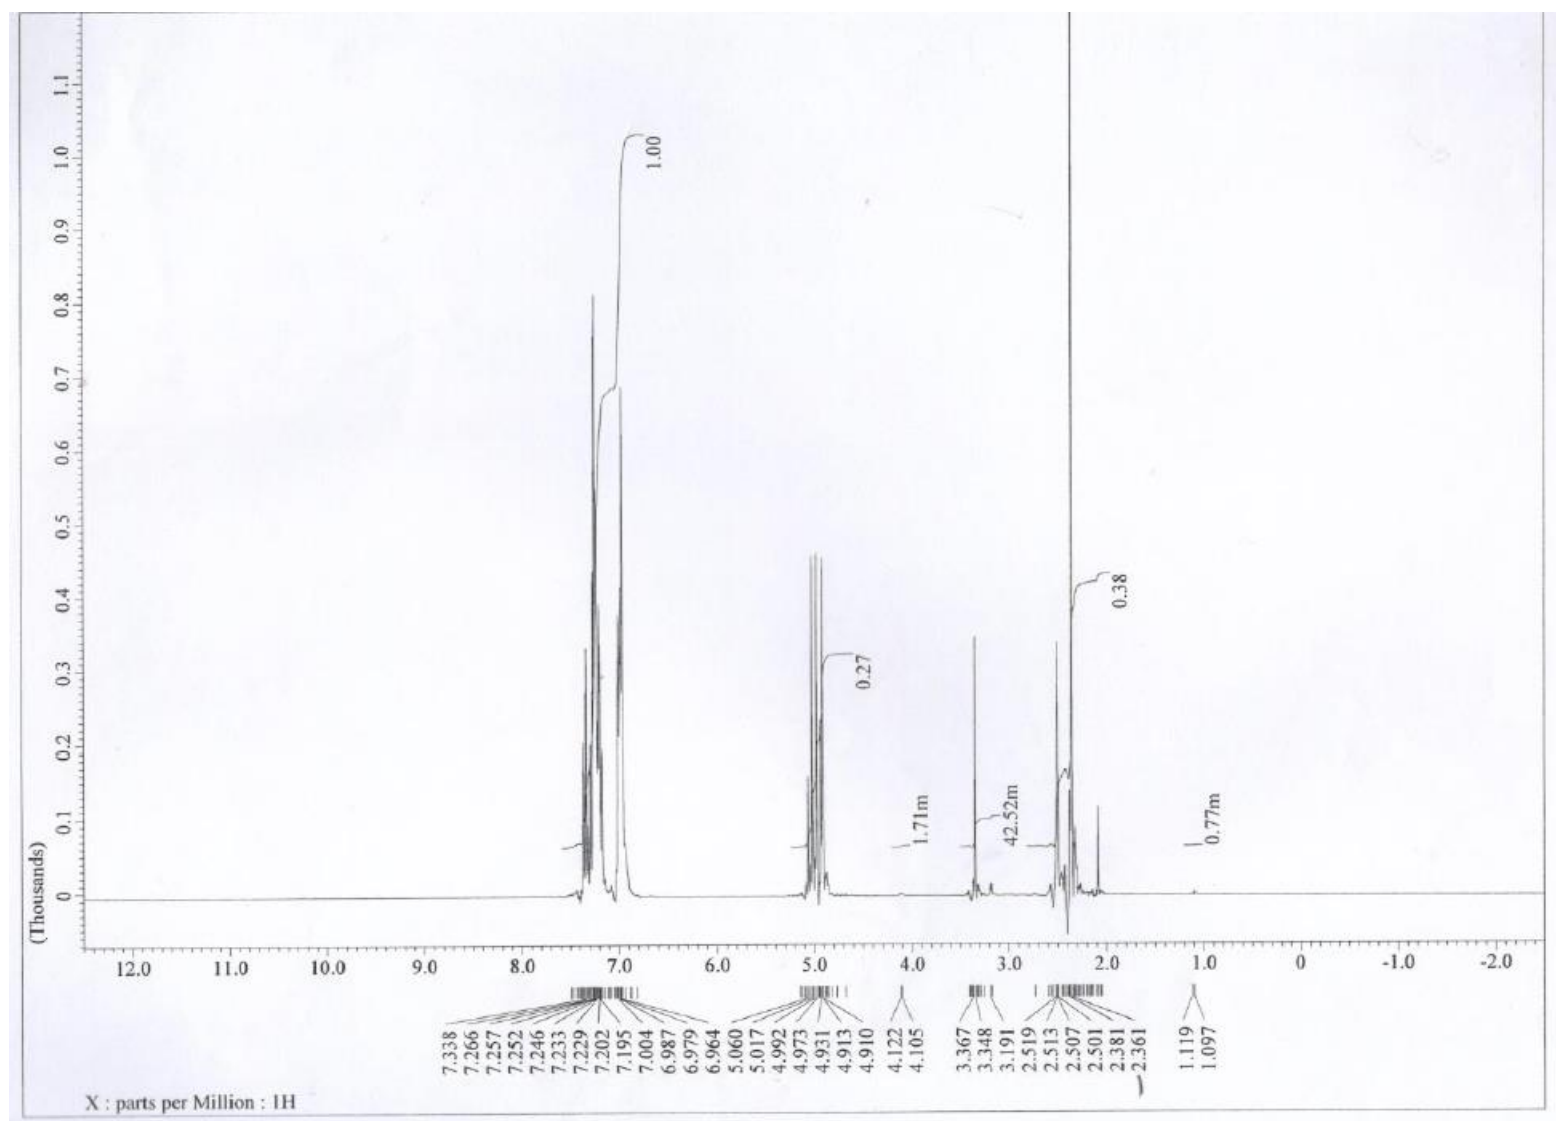

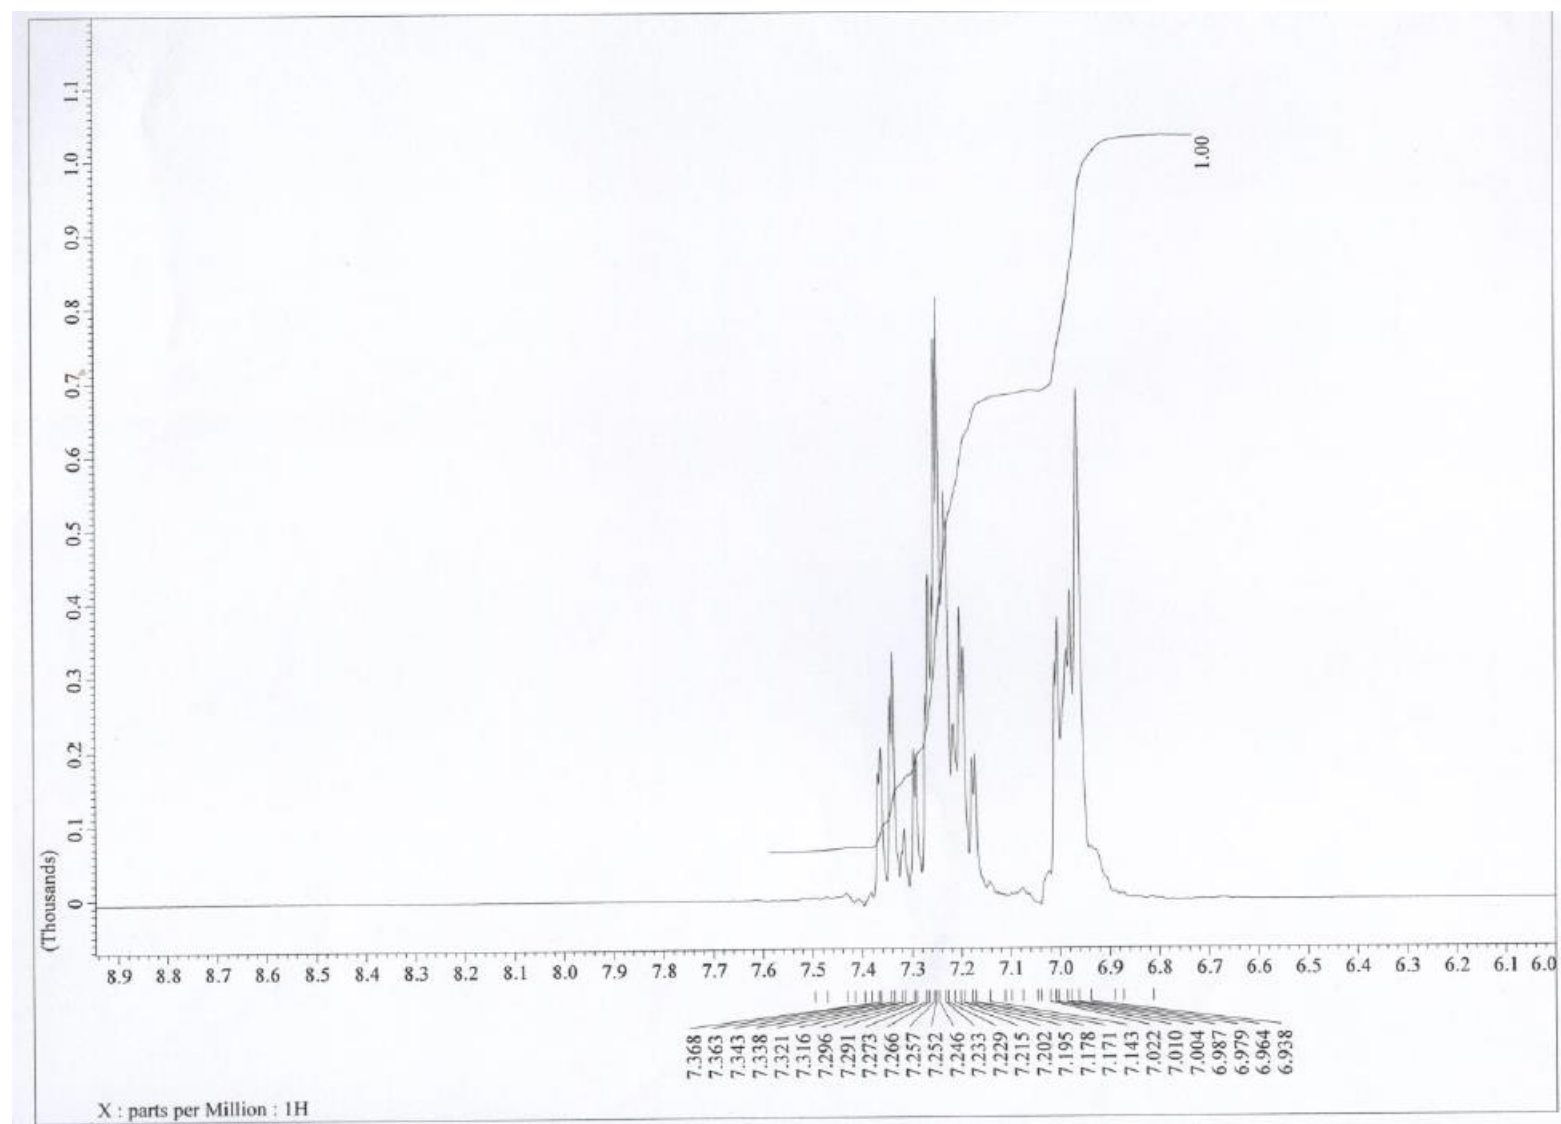



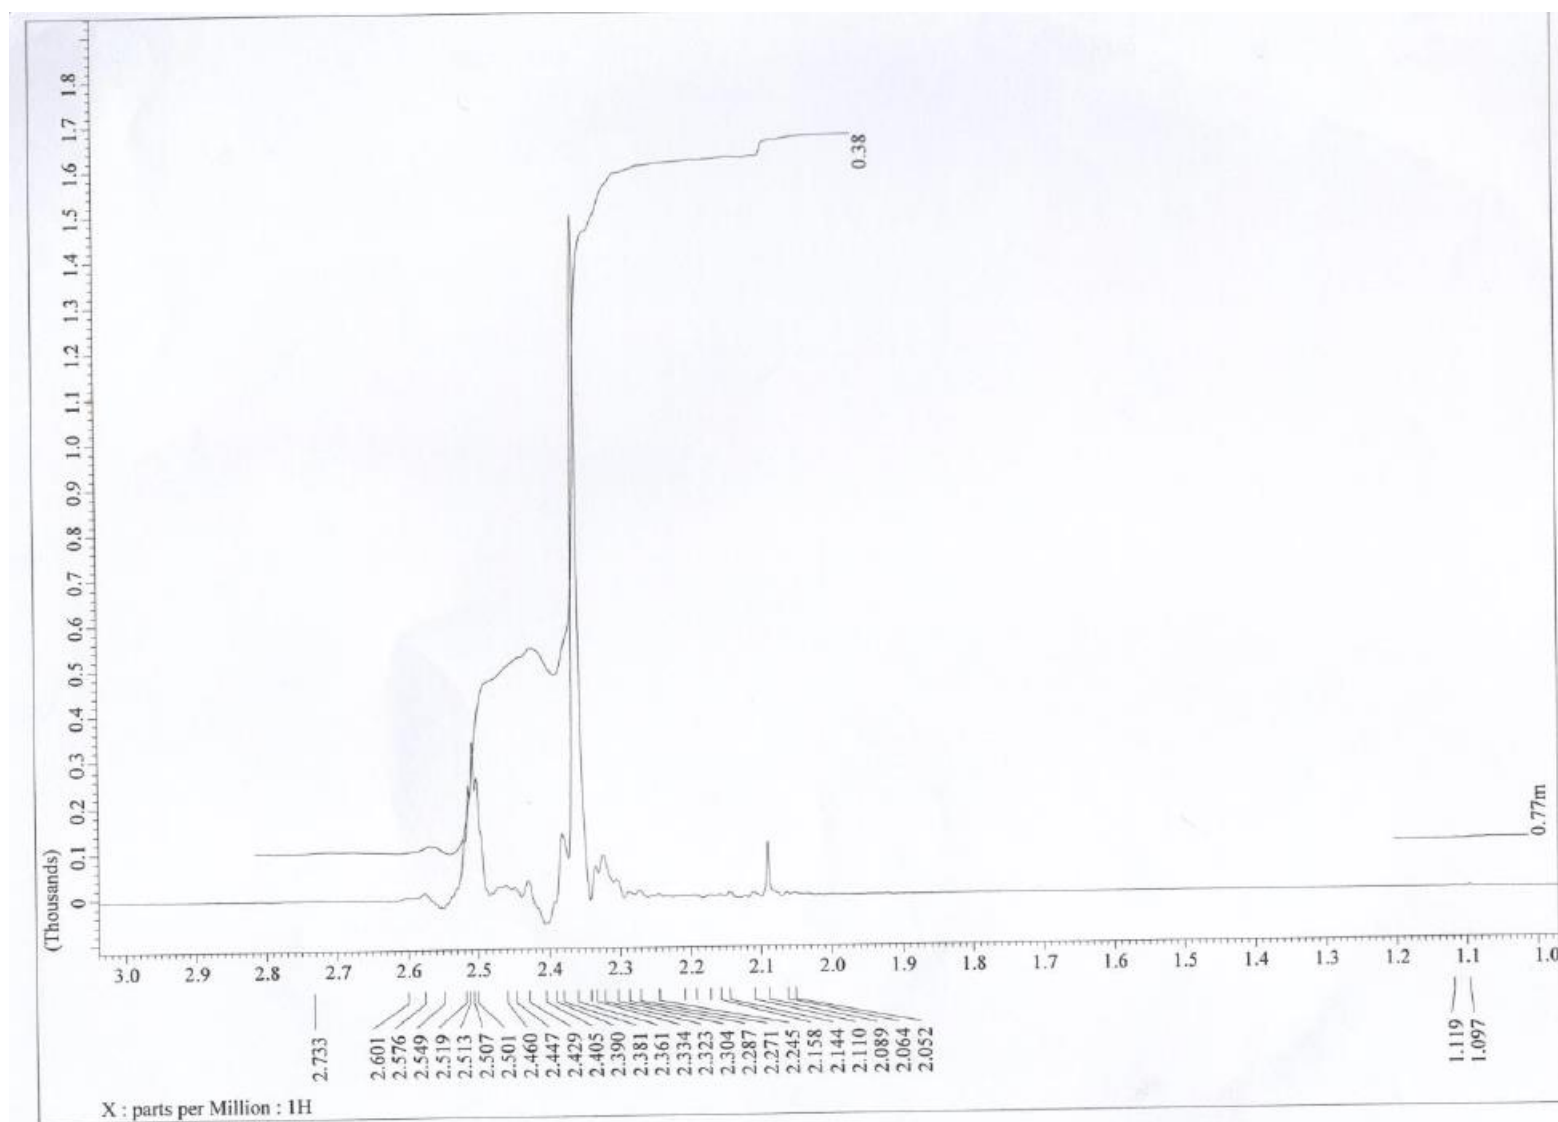

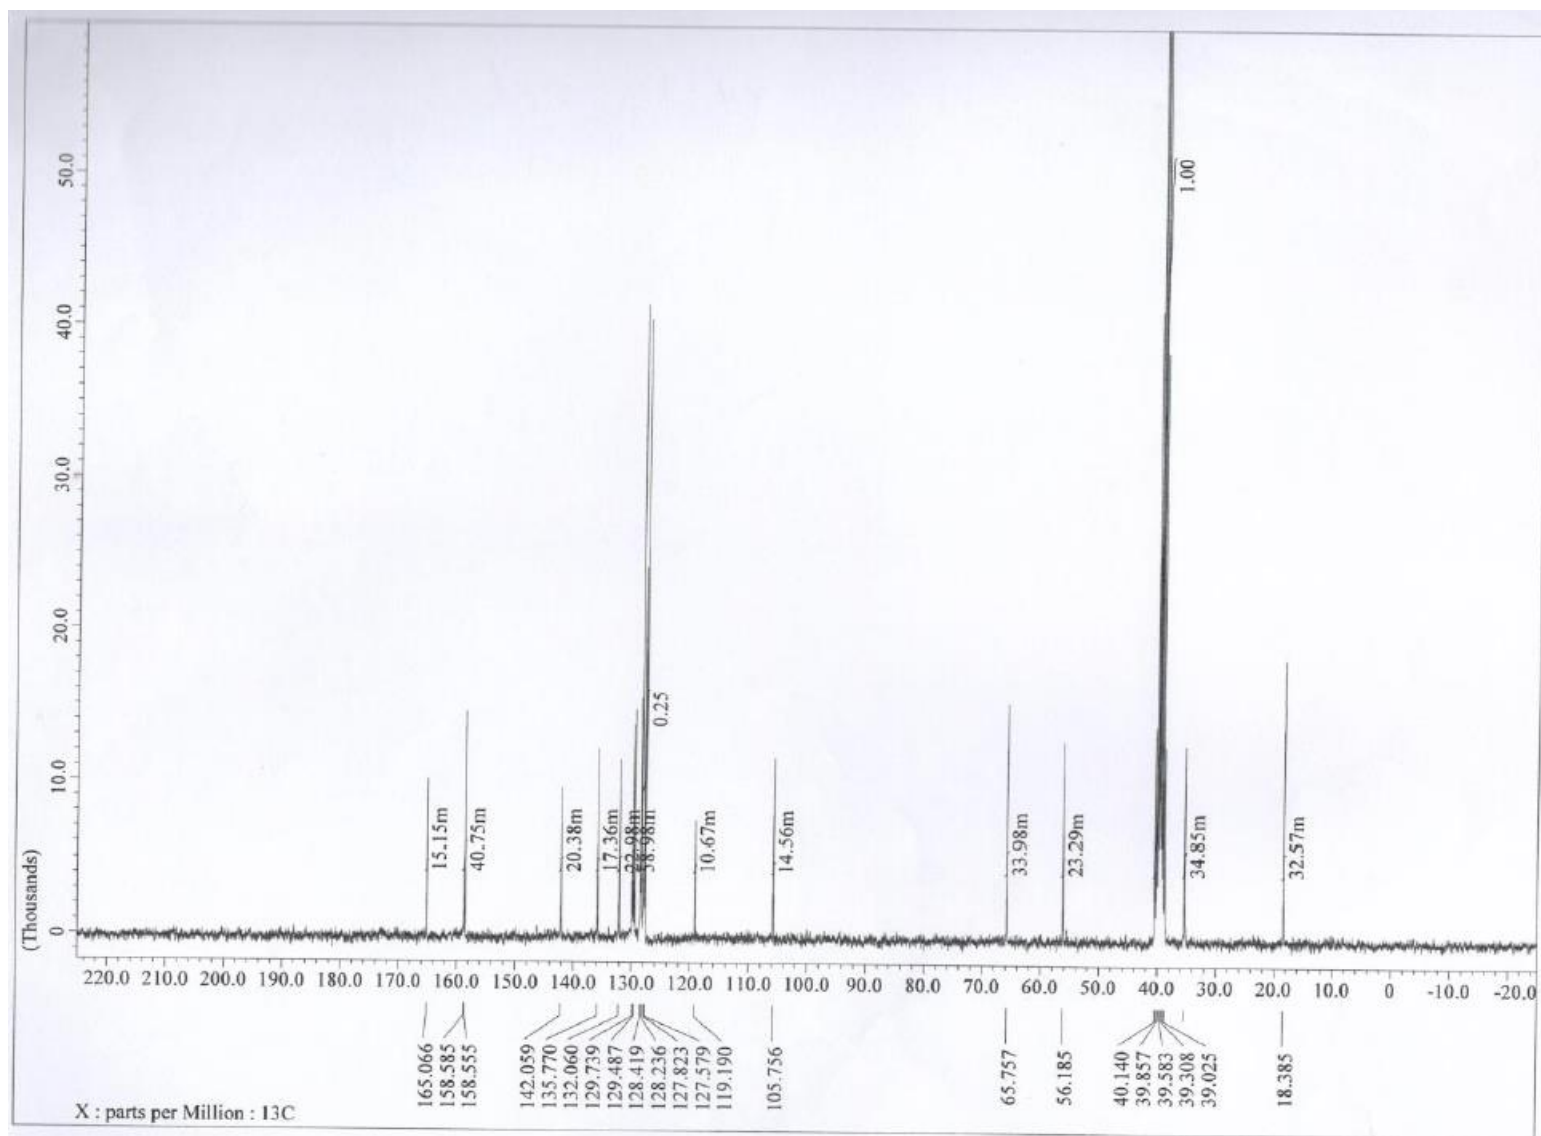

Line#:2 R.Time:3.2(Scan#:382)  
MassPeaks:240  
RawMode:Single 3.2(382) BasePeak:91(4538062)  
BG Mode:None Group 1 - Event 1

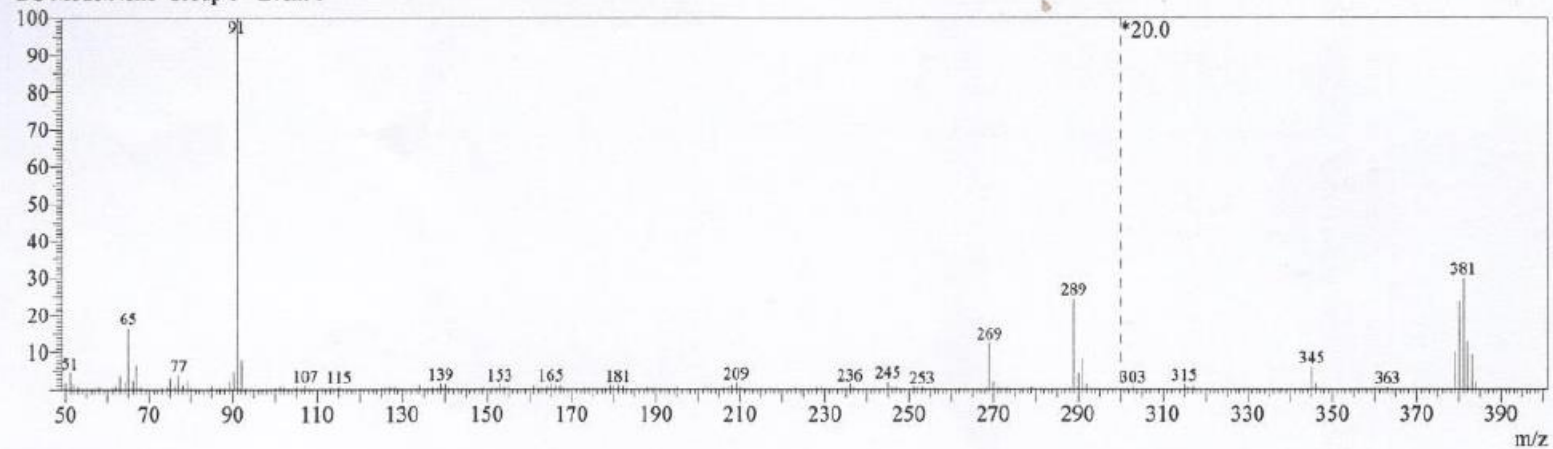

Mass Table  
Line#:1 R.Time:1.8(Scan#:213)  
MassPeaks:226  
RawMode:Single 1.8(213) BasePeak:91(1976876)  
BG Mode:None Group 1 - Event 1



| #  | m/z   | Abs. In | Rel. Int. | #  | m/z    | Abs. In | Rel. Int. | #   | m/z    | Abs. In | Rel. Int. |
|----|-------|---------|-----------|----|--------|---------|-----------|-----|--------|---------|-----------|
| 1  | 50.00 | 32201   | 1.63      | 46 | 95.05  | 3421    | 0.17      | 91  | 141.05 | 9319    | 0.47      |
| 2  | 51.00 | 78199   | 3.96      | 47 | 96.10  | 2207    | 0.11      | 92  | 142.10 | 2914    | 0.15      |
| 3  | 52.00 | 25655   | 1.30      | 48 | 97.05  | 8018    | 0.41      | 93  | 143.10 | 4522    | 0.23      |
| 4  | 53.00 | 12378   | 0.63      | 49 | 98.05  | 4261    | 0.22      | 94  | 144.10 | 2986    | 0.15      |
| 5  | 54.05 | 5763    | 0.29      | 50 | 99.05  | 13802   | 0.70      | 95  | 145.05 | 5046    | 0.26      |
| 6  | 55.00 | 15807   | 0.80      | 51 | 100.05 | 10987   | 0.56      | 96  | 146.05 | 1146    | 0.06      |
| 7  | 56.05 | 4893    | 0.25      | 52 | 101.05 | 25612   | 1.30      | 97  | 147.05 | 1933    | 0.10      |
| 8  | 57.05 | 15289   | 0.77      | 53 | 102.05 | 16296   | 0.82      | 98  | 148.05 | 1572    | 0.08      |
| 9  | 58.00 | 9228    | 0.47      | 54 | 103.05 | 3612    | 0.18      | 99  | 149.00 | 12615   | 0.64      |
| 10 | 59.00 | 2566    | 0.13      | 55 | 104.15 | 2387    | 0.12      | 100 | 150.05 | 3624    | 0.18      |
| 11 | 60.00 | 3598    | 0.18      | 56 | 105.05 | 17020   | 0.86      | 101 | 151.05 | 5877    | 0.30      |
| 12 | 61.00 | 5314    | 0.27      | 57 | 106.10 | 8306    | 0.42      | 102 | 152.05 | 7992    | 0.40      |
| 13 | 62.05 | 14311   | 0.72      | 58 | 107.05 | 27670   | 1.40      | 103 | 153.05 | 36006   | 1.82      |
| 14 | 63.00 | 57111   | 2.89      | 59 | 108.05 | 8355    | 0.42      | 104 | 154.05 | 12531   | 0.63      |
| 15 | 64.05 | 30562   | 1.55      | 60 | 109.05 | 3376    | 0.17      | 105 | 155.05 | 9082    | 0.46      |
| 16 | 65.00 | 247215  | 12.51     | 61 | 110.05 | 2741    | 0.14      | 106 | 156.05 | 2451    | 0.12      |
| 17 | 66.05 | 35717   | 1.81      | 62 | 111.05 | 14959   | 0.76      | 107 | 157.05 | 1518    | 0.08      |
| 18 | 67.00 | 92036   | 4.66      | 63 | 112.05 | 7014    | 0.35      | 108 | 160.05 | 1191    | 0.06      |
| 19 | 68.00 | 10015   | 0.51      | 64 | 113.05 | 14534   | 0.74      | 109 | 161.00 | 18938   | 0.96      |
| 20 | 69.05 | 9983    | 0.50      | 65 | 114.05 | 8599    | 0.43      | 110 | 162.00 | 8660    | 0.44      |
| 21 | 70.05 | 3228    | 0.16      | 66 | 115.05 | 19148   | 0.97      | 111 | 163.00 | 9638    | 0.49      |
| 22 | 71.05 | 8292    | 0.42      | 67 | 116.10 | 5874    | 0.30      | 112 | 164.00 | 16825   | 0.85      |
| 23 | 72.05 | 1336    | 0.07      | 68 | 117.10 | 3377    | 0.17      | 113 | 164.95 | 26320   | 1.33      |
| 24 | 73.00 | 7716    | 0.39      | 69 | 118.05 | 2907    | 0.15      | 114 | 166.00 | 18545   | 0.94      |
| 25 | 74.05 | 15676   | 0.79      | 70 | 119.05 | 2894    | 0.15      | 115 | 167.00 | 21142   | 1.07      |
| 26 | 75.00 | 56441   | 2.86      | 71 | 121.05 | 1604    | 0.08      | 116 | 168.00 | 8537    | 0.43      |
| 27 | 76.05 | 20370   | 1.03      | 72 | 122.05 | 2006    | 0.10      | 117 | 169.00 | 2230    | 0.11      |
| 28 | 77.05 | 68758   | 3.48      | 73 | 123.05 | 3018    | 0.15      | 118 | 170.05 | 1032    | 0.05      |
| 29 | 78.05 | 17958   | 0.91      | 74 | 124.05 | 2740    | 0.14      | 119 | 171.00 | 5887    | 0.30      |
| 30 | 79.05 | 43343   | 2.19      | 75 | 125.05 | 9179    | 0.46      | 120 | 172.05 | 1285    | 0.07      |
| 31 | 80.05 | 6227    | 0.31      | 76 | 126.05 | 18835   | 0.95      | 121 | 173.00 | 10479   | 0.53      |
| 32 | 81.05 | 3941    | 0.20      | 77 | 127.05 | 23148   | 1.17      | 122 | 174.00 | 8868    | 0.45      |
| 33 | 82.10 | 2570    | 0.13      | 78 | 128.10 | 17452   | 0.88      | 123 | 175.00 | 7954    | 0.40      |
| 34 | 83.10 | 6105    | 0.31      | 79 | 129.10 | 5956    | 0.30      | 124 | 175.95 | 4988    | 0.25      |
| 35 | 84.05 | 5049    | 0.26      | 80 | 130.10 | 1746    | 0.09      | 125 | 177.00 | 7686    | 0.39      |
| 36 | 85.00 | 21319   | 1.08      | 81 | 131.10 | 1382    | 0.07      | 126 | 178.00 | 5894    | 0.30      |
| 37 | 86.00 | 5599    | 0.28      | 82 | 132.10 | 1274    | 0.06      | 127 | 179.00 | 14127   | 0.71      |
| 38 | 87.00 | 8794    | 0.44      | 83 | 133.15 | 5478    | 0.28      | 128 | 180.00 | 24593   | 1.24      |
| 39 | 88.05 | 8953    | 0.45      | 84 | 134.10 | 22330   | 1.13      | 129 | 181.00 | 20444   | 1.03      |
| 40 | 89.05 | 46953   | 2.38      | 85 | 135.05 | 5215    | 0.26      | 130 | 182.00 | 17866   | 0.90      |
| 41 | 90.05 | 54701   | 2.77      | 86 | 136.05 | 7346    | 0.37      | 131 | 183.00 | 6953    | 0.35      |
| 42 | 91.05 | 197687  | 100.00    | 87 | 137.05 | 14311   | 0.72      | 132 | 184.00 | 2734    | 0.14      |
| 43 | 92.05 | 156782  | 7.93      | 88 | 138.05 | 14382   | 0.73      | 133 | 185.05 | 1263    | 0.06      |
| 44 | 93.05 | 7648    | 0.39      | 89 | 139.05 | 36540   | 1.85      | 134 | 187.00 | 2614    | 0.13      |
| 45 | 94.05 | 2013    | 0.10      | 90 | 140.05 | 30360   | 1.54      | 135 | 187.95 | 12865   | 0.65      |

| #   | m/z    | Abs. In | Rel. Int. | #   | m/z    | Abs. In | Rel. Int. | #   | m/z    | Abs. In | Rel. Int. |
|-----|--------|---------|-----------|-----|--------|---------|-----------|-----|--------|---------|-----------|
| 136 | 189.00 | 9553    | 0.48      | 167 | 221.00 | 1260    | 0.06      | 198 | 256.00 | 2937    | 0.15      |
| 137 | 189.95 | 8100    | 0.41      | 168 | 223.05 | 11103   | 0.56      | 199 | 257.05 | 1912    | 0.10      |
| 138 | 191.00 | 5964    | 0.30      | 169 | 224.00 | 3199    | 0.16      | 200 | 261.05 | 2849    | 0.14      |
| 139 | 192.00 | 5844    | 0.30      | 170 | 225.00 | 3134    | 0.16      | 201 | 262.00 | 6978    | 0.35      |
| 140 | 193.00 | 4593    | 0.23      | 171 | 226.00 | 2244    | 0.11      | 202 | 263.00 | 2242    | 0.11      |
| 141 | 194.05 | 3676    | 0.19      | 172 | 227.05 | 2527    | 0.13      | 203 | 264.00 | 2529    | 0.13      |
| 142 | 195.00 | 13518   | 0.68      | 173 | 228.00 | 12326   | 0.62      | 204 | 268.15 | 10429   | 0.53      |
| 143 | 196.00 | 3114    | 0.16      | 174 | 228.95 | 16494   | 0.83      | 205 | 269.05 | 429561  | 21.73     |
| 144 | 197.05 | 1328    | 0.07      | 175 | 229.95 | 7881    | 0.40      | 206 | 270.05 | 75120   | 3.80      |
| 145 | 197.95 | 1593    | 0.08      | 176 | 230.95 | 7271    | 0.37      | 207 | 271.00 | 16881   | 0.85      |
| 146 | 199.05 | 1317    | 0.07      | 177 | 232.00 | 1860    | 0.09      | 208 | 272.00 | 11702   | 0.59      |
| 147 | 199.95 | 7662    | 0.39      | 178 | 233.05 | 2092    | 0.11      | 209 | 273.00 | 9337    | 0.47      |
| 148 | 201.00 | 5606    | 0.28      | 179 | 234.00 | 11143   | 0.56      | 210 | 274.00 | 4671    | 0.24      |
| 149 | 202.00 | 8769    | 0.44      | 180 | 235.05 | 4660    | 0.24      | 211 | 275.00 | 2820    | 0.14      |
| 150 | 202.95 | 5893    | 0.30      | 181 | 236.00 | 48682   | 2.46      | 212 | 279.05 | 13011   | 0.66      |
| 151 | 203.95 | 3740    | 0.19      | 182 | 237.00 | 25834   | 1.31      | 213 | 280.05 | 2772    | 0.14      |
| 152 | 205.05 | 2911    | 0.15      | 183 | 238.00 | 4622    | 0.23      | 214 | 288.05 | 12229   | 0.62      |
| 153 | 206.00 | 14089   | 0.71      | 184 | 239.05 | 2084    | 0.11      | 215 | 289.00 | 904460  | 45.75     |
| 154 | 207.00 | 10484   | 0.53      | 185 | 240.05 | 1476    | 0.07      | 216 | 290.00 | 152519  | 7.72      |
| 155 | 208.00 | 25386   | 1.28      | 186 | 243.00 | 4743    | 0.24      | 217 | 291.00 | 303908  | 15.37     |
| 156 | 209.00 | 39159   | 1.98      | 187 | 244.05 | 8460    | 0.43      | 218 | 292.00 | 49985   | 2.53      |
| 157 | 210.00 | 10812   | 0.55      | 188 | 245.00 | 64330   | 3.25      | 219 | 292.95 | 6032    | 0.31      |
| 158 | 211.00 | 5169    | 0.26      | 189 | 246.00 | 13092   | 0.66      | 220 | 345.05 | 9213    | 0.47      |
| 159 | 212.00 | 2177    | 0.11      | 190 | 247.00 | 23327   | 1.18      | 221 | 346.05 | 2271    | 0.11      |
| 160 | 213.00 | 1082    | 0.05      | 191 | 248.00 | 3674    | 0.19      | 222 | 379.05 | 2892    | 0.15      |
| 161 | 215.00 | 3820    | 0.19      | 192 | 249.05 | 1235    | 0.06      | 223 | 380.00 | 30342   | 1.53      |
| 162 | 216.00 | 4743    | 0.24      | 193 | 251.05 | 24110   | 1.22      | 224 | 381.05 | 9439    | 0.48      |
| 163 | 216.95 | 3374    | 0.17      | 194 | 252.05 | 12294   | 0.62      | 225 | 382.00 | 11164   | 0.56      |
| 164 | 217.95 | 2640    | 0.13      | 195 | 253.00 | 14918   | 0.75      | 226 | 383.00 | 2874    | 0.15      |
| 165 | 219.00 | 2314    | 0.12      | 196 | 254.00 | 7844    | 0.40      |     |        |         |           |
| 166 | 220.00 | 1119    | 0.06      | 197 | 255.00 | 4310    | 0.22      |     |        |         |           |
